# Supplementary material for: Click catalysis and DNA conjugation using a nanoscale DNA/silver cluster pair
Source: Royal Society of Chemistry journal article supplement (doi:10.1039/d4nr02938k), 2024-01-01
Supplement: d4nr02938k1.pdf [file d4nr02938k1.pdf]

**Click Catalysis and DNA Conjugation using a Nanoscale DNA/Silver Cluster Pair**

Caleb J. Setzler<sup>a</sup> and Jeffrey T. Petty<sup>a,\*</sup>

<sup>a</sup>Department of Chemistry, Furman University, Greenville, SC 29613, United States

Table 15: Summary of M/Z and Relative Intensities for the -4 (Entries 1-18) and -5 (Entries 19-39) of Hx-1/Ag<sub>10</sub><sup>6+</sup>

|    | 1                               | 2                               | 3                                | 4                                                                  | 5                                                                  | 6                                                                  | 7                 | 8                                                  | 9                                                  | 10                                                 |
|----|---------------------------------|---------------------------------|----------------------------------|--------------------------------------------------------------------|--------------------------------------------------------------------|--------------------------------------------------------------------|-------------------|----------------------------------------------------|----------------------------------------------------|----------------------------------------------------|
|    | M/Z <sub>obs</sub> <sup>a</sup> | Int <sub>obs</sub> <sup>b</sup> | M/Z <sub>pred</sub> <sup>c</sup> | Int <sub>pred</sub> (Ag <sub>10</sub> <sup>6+</sup> ) <sup>d</sup> | Int <sub>pred</sub> (Ag <sub>10</sub> <sup>7+</sup> ) <sup>e</sup> | Int <sub>pred</sub> (Ag <sub>10</sub> <sup>5+</sup> ) <sup>f</sup> | ΔM/Z <sup>g</sup> | ΔInt(Ag <sub>10</sub> <sup>6+</sup> ) <sup>h</sup> | ΔInt(Ag <sub>10</sub> <sup>7+</sup> ) <sup>i</sup> | ΔInt(Ag <sub>10</sub> <sup>5+</sup> ) <sup>j</sup> |
| 1  | 1299.9774                       | 0.08                            | 1299.9784                        | 0.01                                                               | 0.03                                                               | 0.00                                                               | 0.78              | 0.06                                               | 0.05                                               | 0.08                                               |
| 2  | 1300.1770                       | 0.08                            | 1300.1788                        | 0.03                                                               | 0.08                                                               | 0.01                                                               | 1.42              | 0.05                                               | 0.00                                               | 0.06                                               |
| 3  | 1300.3776                       | 0.18                            | 1300.3786                        | 0.08                                                               | 0.12                                                               | 0.03                                                               | 0.75              | 0.10                                               | 0.05                                               | 0.15                                               |
| 4  | 1300.5769                       | 0.19                            | 1300.5789                        | 0.12                                                               | 0.25                                                               | 0.08                                                               | 1.54              | 0.07                                               | 0.06                                               | 0.12                                               |
| 5  | 1300.7715                       | 0.35                            | 1300.7787                        | 0.25                                                               | 0.35                                                               | 0.12                                                               | 5.57              | 0.11                                               | 0.00                                               | 0.23                                               |
| 6  | 1300.9788                       | 0.45                            | 1300.9790                        | 0.35                                                               | 0.55                                                               | 0.25                                                               | 0.13              | 0.10                                               | 0.10                                               | 0.20                                               |
| 7  | 1301.1754                       | 0.60                            | 1301.1789                        | 0.55                                                               | 0.68                                                               | 0.35                                                               | 2.68              | 0.06                                               | 0.08                                               | 0.25                                               |
| 8  | 1301.3776                       | 0.76                            | 1301.3791                        | 0.68                                                               | 0.86                                                               | 0.55                                                               | 1.13              | 0.08                                               | 0.10                                               | 0.22                                               |
| 9  | 1301.5779                       | 0.87                            | 1301.5791                        | 0.86                                                               | 0.94                                                               | 0.68                                                               | 0.88              | 0.01                                               | 0.07                                               | 0.19                                               |
| 10 | 1301.7773                       | 0.95                            | 1301.7792                        | 0.94                                                               | 1.00                                                               | 0.86                                                               | 1.45              | 0.01                                               | 0.05                                               | 0.09                                               |
| 11 | 1301.9788                       | 1.00                            | 1301.9792                        | 1.00                                                               | 0.96                                                               | 0.94                                                               | 0.32              | 0.00                                               | 0.04                                               | 0.06                                               |
| 12 | 1302.1783                       | 0.96                            | 1302.1793                        | 0.96                                                               | 0.87                                                               | 1.00                                                               | 0.80              | 0.00                                               | 0.09                                               | 0.04                                               |
| 13 | 1302.3778                       | 0.83                            | 1302.3794                        | 0.87                                                               | 0.73                                                               | 0.96                                                               | 1.24              | 0.04                                               | 0.10                                               | 0.13                                               |
| 14 | 1302.5790                       | 0.69                            | 1302.5795                        | 0.73                                                               | 0.57                                                               | 0.87                                                               | 0.41              | 0.03                                               | 0.12                                               | 0.18                                               |
| 15 | 1302.7786                       | 0.57                            | 1302.7797                        | 0.57                                                               | 0.42                                                               | 0.73                                                               | 0.81              | 0.00                                               | 0.15                                               | 0.16                                               |
| 16 | 1302.9794                       | 0.43                            | 1302.9798                        | 0.42                                                               | 0.28                                                               | 0.57                                                               | 0.29              | 0.02                                               | 0.15                                               | 0.14                                               |
| 17 | 1303.1796                       | 0.34                            | 1303.1799                        | 0.28                                                               | 0.18                                                               | 0.42                                                               | 0.25              | 0.05                                               | 0.16                                               | 0.08                                               |
| 18 | 1303.3790                       | 0.21                            | 1303.3801                        | 0.18                                                               | 0.11                                                               | 0.28                                                               | 0.84              | 0.03                                               | 0.10                                               | 0.07                                               |
| 19 | 1303.5800                       | 0.15                            | 1303.5803                        | 0.11                                                               | 0.06                                                               | 0.18                                                               | 0.22              | 0.04                                               | 0.09                                               | 0.03                                               |
| 20 | 1303.7806                       | 0.11                            | 1303.7805                        | 0.06                                                               | 0.03                                                               | 0.11                                                               | 0.07              | 0.05                                               | 0.08                                               | 0.01                                               |
| 21 | 1303.9791                       | 0.08                            | 1303.9808                        | 0.03                                                               | 0.01                                                               | 0.06                                                               | 1.27              | 0.05                                               | 0.07                                               | 0.02                                               |
| 22 | 1304.1831                       | 0.06                            | 1304.1810                        | 0.01                                                               | 0.01                                                               | 0.03                                                               | 1.60              | 0.05                                               | 0.06                                               | 0.03                                               |
| 23 | 1304.3788                       | 0.06                            | 1304.3813                        | 0.01                                                               | 0.00                                                               | 0.01                                                               | 1.92              | 0.05                                               | 0.05                                               | 0.04                                               |
| 24 | 1624.7155                       | 0.01                            | 1624.7246                        | 0.00                                                               | 0.00                                                               | 0.00                                                               | 5.61              | 0.01                                               | 0.01                                               | 0.01                                               |
| 25 | 1625.2189                       | 0.03                            | 1625.2248                        | 0.01                                                               | 0.03                                                               | 0.00                                                               | 3.65              | 0.02                                               | 0.01                                               | 0.03                                               |
| 26 | 1625.4707                       | 0.05                            | 1625.4754                        | 0.03                                                               | 0.08                                                               | 0.01                                                               | 2.87              | 0.02                                               | 0.03                                               | 0.03                                               |
| 27 | 1625.7214                       | 0.10                            | 1625.7251                        | 0.08                                                               | 0.12                                                               | 0.03                                                               | 2.25              | 0.03                                               | 0.02                                               | 0.08                                               |
| 28 | 1625.9734                       | 0.16                            | 1625.9754                        | 0.12                                                               | 0.25                                                               | 0.08                                                               | 1.25              | 0.03                                               | 0.09                                               | 0.08                                               |
| 29 | 1626.2241                       | 0.29                            | 1626.2252                        | 0.25                                                               | 0.35                                                               | 0.12                                                               | 0.70              | 0.04                                               | 0.07                                               | 0.16                                               |
| 30 | 1626.4744                       | 0.39                            | 1626.4755                        | 0.35                                                               | 0.55                                                               | 0.25                                                               | 0.69              | 0.04                                               | 0.15                                               | 0.15                                               |
| 31 | 1626.7245                       | 0.59                            | 1626.7254                        | 0.55                                                               | 0.68                                                               | 0.35                                                               | 0.57              | 0.04                                               | 0.10                                               | 0.23                                               |
| 32 | 1626.9756                       | 0.72                            | 1626.9757                        | 0.68                                                               | 0.86                                                               | 0.55                                                               | 0.03              | 0.04                                               | 0.14                                               | 0.18                                               |
| 33 | 1627.2255                       | 0.89                            | 1627.2256                        | 0.86                                                               | 0.94                                                               | 0.68                                                               | 0.08              | 0.03                                               | 0.06                                               | 0.20                                               |
| 34 | 1627.4750                       | 0.96                            | 1627.4758                        | 0.94                                                               | 1.00                                                               | 0.86                                                               | 0.49              | 0.02                                               | 0.04                                               | 0.10                                               |
| 35 | 1627.7252                       | 1.00                            | 1627.7258                        | 1.00                                                               | 0.96                                                               | 0.94                                                               | 0.39              | 0.00                                               | 0.04                                               | 0.06                                               |
| 36 | 1627.9762                       | 0.96                            | 1627.9760                        | 0.96                                                               | 0.87                                                               | 1.00                                                               | 0.12              | 0.00                                               | 0.09                                               | 0.04                                               |
| 37 | 1628.2253                       | 0.86                            | 1628.2261                        | 0.87                                                               | 0.73                                                               | 0.96                                                               | 0.49              | 0.01                                               | 0.14                                               | 0.09                                               |
| 38 | 1628.4758                       | 0.72                            | 1628.4762                        | 0.73                                                               | 0.57                                                               | 0.87                                                               | 0.27              | 0.01                                               | 0.15                                               | 0.15                                               |
| 39 | 1628.7253                       | 0.57                            | 1628.7264                        | 0.57                                                               | 0.42                                                               | 0.73                                                               | 0.66              | 0.00                                               | 0.16                                               | 0.15                                               |
| 40 | 1628.9762                       | 0.42                            | 1628.9766                        | 0.42                                                               | 0.28                                                               | 0.57                                                               | 0.21              | 0.01                                               | 0.14                                               | 0.15                                               |
| 41 | 1629.2264                       | 0.29                            | 1629.2267                        | 0.28                                                               | 0.18                                                               | 0.42                                                               | 0.21              | 0.01                                               | 0.11                                               | 0.12                                               |
| 42 | 1629.4761                       | 0.20                            | 1629.4770                        | 0.18                                                               | 0.11                                                               | 0.28                                                               | 0.52              | 0.02                                               | 0.09                                               | 0.09                                               |
| 43 | 1629.7269                       | 0.12                            | 1629.7272                        | 0.11                                                               | 0.06                                                               | 0.18                                                               | 0.18              | 0.02                                               | 0.07                                               | 0.05                                               |
| 44 | 1629.9783                       | 0.08                            | 1629.9775                        | 0.06                                                               | 0.03                                                               | 0.11                                                               | 0.52              | 0.02                                               | 0.05                                               | 0.03                                               |
| 45 | 1630.2266                       | 0.05                            | 1630.2278                        | 0.03                                                               | 0.01                                                               | 0.06                                                               | 0.71              | 0.02                                               | 0.04                                               | 0.01                                               |
| 46 | 1630.4729                       | 0.04                            | 1630.4781                        | 0.01                                                               | 0.01                                                               | 0.03                                                               | 3.18              | 0.02                                               | 0.03                                               | 0.01                                               |
| 47 | 1630.7207                       | 0.03                            | 1630.7285                        | 0.01                                                               | 0.00                                                               | 0.01                                                               | 4.76              | 0.03                                               | 0.03                                               | 0.02                                               |
| 48 | 1630.9696                       | 0.03                            | 1630.9789                        | 0.00                                                               | 0.00                                                               | 0.01                                                               | 5.67              | 0.03                                               | 0.03                                               | 0.03                                               |
| 49 | 1631.2194                       | 0.04                            | 1631.2293                        | 0.00                                                               | 0.00                                                               | 0.00                                                               | 6.06              | 0.04                                               | 0.04                                               | 0.04                                               |
|    |                                 |                                 |                                  |                                                                    |                                                                    |                                                                    | 1.40              | 0.02                                               | 0.07                                               | 0.09                                               |

<sup>a</sup>Column 1: Observed M/Z values <sup>b</sup>Column 2: Observed and normalized intensities. The highlighted values (yellow) indicate the peak of the two distributions for the -4 and -5 charged complexes. <sup>c</sup>Column 3: Predicted M/Z values based on the molecular formula [C<sub>175</sub>H<sub>221</sub>O<sub>113</sub>N<sub>53</sub>P<sub>18</sub>Ag<sub>10</sub>]<sup>4-</sup> and [C<sub>175</sub>H<sub>220</sub>O<sub>113</sub>N<sub>53</sub>P<sub>18</sub>Ag<sub>10</sub>]<sup>5-</sup>, respectively. <sup>d</sup>Column 4: Predicted intensities based on a Ag<sub>10</sub><sup>6+</sup> adduct. <sup>e</sup>Column 5: Predicted intensities based on a Ag<sub>10</sub><sup>7+</sup> adduct. <sup>f</sup>Column 6: Predicted intensities based on a Ag<sub>10</sub><sup>5+</sup> adduct. <sup>g</sup>Column 7: Absolute differences in the observed and predicted M/Z values (|Column 1 – Column 3|). The observed average value of 1.40 ppm at the bottom of the column (red font) is within the precision of our instrument. <sup>h</sup>Column 8: Absolute differences in the observed and predicted intensities based on a Ag<sub>10</sub><sup>6+</sup> adduct (|Column 2 – Column 4|) <sup>i</sup>Column 9: Absolute differences in the observed and predicted intensities based on a Ag<sub>10</sub><sup>5+</sup> adduct (|Column 2 – Column 5|) <sup>j</sup>Column 10: Absolute differences in the observed and predicted intensities based on a Ag<sub>10</sub><sup>7+</sup> adduct (|Column 2 – Column 6|) For Columns 8-10, the highlighted (in yellow) entries are the peak of the distributions for the -4 and -5 charged ions. For Columns 8-10, the red values at the bottom of the columns are the averages of the absolute differences. The small value for the Ag<sub>10</sub><sup>6+</sup> adduct indicates this is the correct oxidation state for this cluster.

Table 2S: Summary of M/Z and Relative Intensities for the -4 (Entries 1-18) and -5 (Entries 19-39) of Hx-1/Ag<sub>10</sub><sup>6+</sup>/N<sub>3</sub>-C<sub>3</sub>H<sub>6</sub>-NH<sub>2</sub>

|    | 2                               |                                  | 3                                |                                                                    | 5,6                                                                |                                                                    | 7                 | 8                                                  |                                                    | 9                                                  | 10 |
|----|---------------------------------|----------------------------------|----------------------------------|--------------------------------------------------------------------|--------------------------------------------------------------------|--------------------------------------------------------------------|-------------------|----------------------------------------------------|----------------------------------------------------|----------------------------------------------------|----|
|    | M/Z <sub>obs</sub> <sup>a</sup> | Int <sub>tobs</sub> <sup>b</sup> | M/Z <sub>pred</sub> <sup>c</sup> | Int <sub>pred</sub> (Ag <sub>10</sub> <sup>6+</sup> ) <sup>d</sup> | Int <sub>pred</sub> (Ag <sub>10</sub> <sup>7+</sup> ) <sup>e</sup> | Int <sub>pred</sub> (Ag <sub>10</sub> <sup>5+</sup> ) <sup>f</sup> | ΔM/Z <sup>g</sup> | ΔInt(Ag <sub>10</sub> <sup>6+</sup> ) <sup>h</sup> | ΔInt(Ag <sub>10</sub> <sup>7+</sup> ) <sup>i</sup> | ΔInt(Ag <sub>10</sub> <sup>5+</sup> ) <sup>j</sup> |    |
| 1  | 1320.4016                       | 0.14                             | 1320.3936                        | 0.07                                                               | 0.12                                                               | 0.03                                                               | 6.1               | 0.07                                               | 0.02                                               | 0.11                                               |    |
| 2  | 1320.5964                       | 0.18                             | 1320.5939                        | 0.12                                                               | 0.24                                                               | 0.07                                                               | 1.9               | 0.06                                               | 0.06                                               | 0.11                                               |    |
| 3  | 1320.7955                       | 0.29                             | 1320.7937                        | 0.24                                                               | 0.35                                                               | 0.12                                                               | 1.3               | 0.05                                               | 0.06                                               | 0.17                                               |    |
| 4  | 1320.9951                       | 0.43                             | 1320.9940                        | 0.35                                                               | 0.54                                                               | 0.24                                                               | 0.9               | 0.08                                               | 0.11                                               | 0.19                                               |    |
| 5  | 1321.1969                       | 0.53                             | 1321.1939                        | 0.54                                                               | 0.68                                                               | 0.35                                                               | 2.3               | 0.01                                               | 0.15                                               | 0.18                                               |    |
| 6  | 1321.3982                       | 0.65                             | 1321.3941                        | 0.68                                                               | 0.85                                                               | 0.54                                                               | 3.1               | 0.02                                               | 0.20                                               | 0.12                                               |    |
| 7  | 1321.5979                       | 0.80                             | 1321.5940                        | 0.85                                                               | 0.94                                                               | 0.68                                                               | 2.9               | 0.05                                               | 0.14                                               | 0.12                                               |    |
| 8  | 1321.7988                       | 0.85                             | 1321.7942                        | 0.94                                                               | 1.00                                                               | 0.85                                                               | 3.5               | 0.09                                               | 0.15                                               | 0.00                                               |    |
| 9  | 1321.9969                       | 1.00                             | 1321.9942                        | 1.00                                                               | 0.96                                                               | 0.94                                                               | 2.0               | 0.00                                               | 0.04                                               | 0.06                                               |    |
| 10 | 1322.1975                       | 0.88                             | 1322.1943                        | 0.96                                                               | 0.88                                                               | 1.00                                                               | 2.4               | 0.08                                               | 0.00                                               | 0.12                                               |    |
| 11 | 1322.3977                       | 0.83                             | 1322.3944                        | 0.88                                                               | 0.74                                                               | 0.96                                                               | 2.5               | 0.05                                               | 0.09                                               | 0.13                                               |    |
| 12 | 1322.5977                       | 0.71                             | 1322.5945                        | 0.74                                                               | 0.58                                                               | 0.88                                                               | 2.4               | 0.03                                               | 0.13                                               | 0.17                                               |    |
| 13 | 1322.7958                       | 0.58                             | 1322.7946                        | 0.58                                                               | 0.42                                                               | 0.74                                                               | 0.9               | 0.00                                               | 0.15                                               | 0.16                                               |    |
| 14 | 1322.9934                       | 0.51                             | 1322.9948                        | 0.42                                                               | 0.29                                                               | 0.58                                                               | 1.0               | 0.09                                               | 0.22                                               | 0.07                                               |    |
| 15 | 1323.1923                       | 0.42                             | 1323.1949                        | 0.29                                                               | 0.18                                                               | 0.42                                                               | 2.0               | 0.13                                               | 0.24                                               | 0.00                                               |    |
| 16 | 1323.3894                       | 0.30                             | 1323.3951                        | 0.18                                                               | 0.11                                                               | 0.29                                                               | 4.3               | 0.11                                               | 0.19                                               | 0.01                                               |    |
| 17 | 1323.5844                       | 0.24                             | 1323.5953                        | 0.11                                                               | 0.06                                                               | 0.18                                                               | 8.2               | 0.13                                               | 0.18                                               | 0.05                                               |    |
| 18 | 1323.7781                       | 0.18                             | 1323.7955                        | 0.06                                                               | 0.03                                                               | 0.11                                                               | 13.1              | 0.12                                               | 0.15                                               | 0.07                                               |    |
| 19 | 1650.7479                       | 0.11                             | 1650.7438                        | 0.07                                                               | 0.12                                                               | 0.03                                                               | 2.5               | 0.04                                               | 0.01                                               | 0.09                                               |    |
| 20 | 1651.0020                       | 0.16                             | 1650.9942                        | 0.12                                                               | 0.24                                                               | 0.07                                                               | 4.7               | 0.04                                               | 0.08                                               | 0.09                                               |    |
| 21 | 1651.2516                       | 0.28                             | 1651.2440                        | 0.24                                                               | 0.35                                                               | 0.12                                                               | 4.6               | 0.04                                               | 0.07                                               | 0.16                                               |    |
| 22 | 1651.5031                       | 0.38                             | 1651.4943                        | 0.35                                                               | 0.54                                                               | 0.24                                                               | 5.4               | 0.03                                               | 0.16                                               | 0.13                                               |    |
| 23 | 1651.7548                       | 0.56                             | 1651.7442                        | 0.54                                                               | 0.68                                                               | 0.35                                                               | 6.4               | 0.02                                               | 0.12                                               | 0.21                                               |    |
| 24 | 1652.0043                       | 0.68                             | 1651.9944                        | 0.68                                                               | 0.85                                                               | 0.54                                                               | 6.0               | 0.00                                               | 0.17                                               | 0.14                                               |    |
| 25 | 1652.2534                       | 0.85                             | 1652.2444                        | 0.85                                                               | 0.94                                                               | 0.68                                                               | 5.5               | 0.01                                               | 0.10                                               | 0.17                                               |    |
| 26 | 1652.5049                       | 0.94                             | 1652.4945                        | 0.94                                                               | 1.00                                                               | 0.85                                                               | 6.3               | 0.00                                               | 0.06                                               | 0.08                                               |    |
| 27 | 1652.7545                       | 1.00                             | 1652.7446                        | 1.00                                                               | 0.96                                                               | 0.94                                                               | 6.0               | 0.00                                               | 0.04                                               | 0.06                                               |    |
| 28 | 1653.0028                       | 0.98                             | 1652.9947                        | 0.96                                                               | 0.88                                                               | 1.00                                                               | 4.9               | 0.01                                               | 0.10                                               | 0.02                                               |    |
| 29 | 1653.2513                       | 0.92                             | 1653.2448                        | 0.88                                                               | 0.74                                                               | 0.96                                                               | 3.9               | 0.05                                               | 0.19                                               | 0.04                                               |    |
| 30 | 1653.5017                       | 0.81                             | 1653.4950                        | 0.74                                                               | 0.58                                                               | 0.88                                                               | 4.1               | 0.08                                               | 0.23                                               | 0.06                                               |    |
| 31 | 1653.7505                       | 0.68                             | 1653.7451                        | 0.58                                                               | 0.42                                                               | 0.74                                                               | 3.3               | 0.10                                               | 0.25                                               | 0.06                                               |    |
| 32 | 1653.9954                       | 0.56                             | 1653.9953                        | 0.42                                                               | 0.29                                                               | 0.58                                                               | 0.1               | 0.14                                               | 0.27                                               | 0.02                                               |    |
| 33 | 1654.2395                       | 0.47                             | 1654.2455                        | 0.29                                                               | 0.18                                                               | 0.42                                                               | 3.6               | 0.18                                               | 0.28                                               | 0.04                                               |    |
| 34 | 1654.4924                       | 0.37                             | 1654.4957                        | 0.18                                                               | 0.11                                                               | 0.29                                                               | 2.0               | 0.19                                               | 0.26                                               | 0.08                                               |    |
| 35 | 1654.7317                       | 0.28                             | 1654.7459                        | 0.11                                                               | 0.06                                                               | 0.18                                                               | 8.6               | 0.17                                               | 0.22                                               | 0.10                                               |    |
| 36 | 1654.9734                       | 0.23                             | 1654.9962                        | 0.06                                                               | 0.03                                                               | 0.11                                                               | 13.8              | 0.17                                               | 0.20                                               | 0.12                                               |    |
| 37 | 1655.2207                       | 0.18                             | 1655.2465                        | 0.03                                                               | 0.01                                                               | 0.06                                                               | 15.6              | 0.15                                               | 0.17                                               | 0.12                                               |    |
| 38 | 1655.4758                       | 0.15                             | 1655.4968                        | 0.01                                                               | 0.01                                                               | 0.03                                                               | 12.7              | 0.13                                               | 0.14                                               | 0.12                                               |    |
| 39 | 1655.7201                       | 0.12                             | 1655.7472                        | 0.01                                                               | 0.00                                                               | 0.01                                                               | 16.4              | 0.11                                               | 0.11                                               | 0.10                                               |    |
|    |                                 |                                  |                                  |                                                                    |                                                                    |                                                                    | 5.1               | 0.07                                               | 0.14                                               | 0.10                                               |    |

<sup>a</sup>Column 1: Observed M/Z values <sup>b</sup>Column 2: Observed and normalized intensities. The highlighted values (yellow) indicate the peak of the two distributions for the -4 and -5 charged complexes. <sup>c</sup>Column 3: Predicted M/Z values based on the molecular formula [C<sub>178</sub>H<sub>226</sub>O<sub>113</sub>N<sub>57</sub>P<sub>18</sub>Ag<sub>10</sub>]<sup>4+</sup> and [C<sub>178</sub>H<sub>228</sub>O<sub>113</sub>N<sub>57</sub>P<sub>18</sub>Ag<sub>10</sub>]<sup>5+</sup>, respectively. <sup>d</sup>Column 4: Predicted intensities based on a Ag<sub>10</sub><sup>6+</sup> adduct. <sup>e</sup>Column 5: Predicted intensities based on a Ag<sub>10</sub><sup>7+</sup> adduct. <sup>f</sup>Column 6: Predicted intensities based on a Ag<sub>10</sub><sup>5+</sup> adduct. <sup>g</sup>Column 7: Absolute differences in the observed and predicted M/Z values (|Column 1 – Column 3|). The observed average value of 5.1 ppm at the bottom of the column (red font) is within the precision of our instrument. <sup>h</sup>Column 8: Absolute differences in the observed and predicted intensities based on a Ag<sub>10</sub><sup>6+</sup> adduct (|Column 2 – Column 4|) <sup>i</sup>Column 9: Absolute differences in the observed and predicted intensities based on a Ag<sub>10</sub><sup>5+</sup> adduct (|Column 2 – Column 5|) <sup>j</sup>Column 10: Absolute differences in the observed and predicted intensities based on a Ag<sub>10</sub><sup>7+</sup> adduct (|Column 2 – Column 6|) For Columns 8-10, the highlighted (in yellow) entries are the peak of the distributions for the -4 and -5 charged ions. For Columns 8-10, the red values at the bottom of the columns are the averages of the absolute differences. The small value for the Ag<sub>10</sub><sup>6+</sup> adduct indicates this is the correct oxidation state for this cluster.

Table 3S: Summary of M/Z and Relative Intensities for the -4 (Entries 1-21) and -5 (Entries 22-39) of Hx-1/Ag<sub>10</sub><sup>6+</sup>/N<sub>3</sub>-C<sub>3</sub>H<sub>6</sub>-OH

| 1                               | 2                               | 3                                | 4                                                                  | 5                                                                  | 6                                                                  | 7                 | 8                                                  | 9                                                  | 10                                                 |      |
|---------------------------------|---------------------------------|----------------------------------|--------------------------------------------------------------------|--------------------------------------------------------------------|--------------------------------------------------------------------|-------------------|----------------------------------------------------|----------------------------------------------------|----------------------------------------------------|------|
| M/Z <sub>obs</sub> <sup>a</sup> | Int <sub>obs</sub> <sup>b</sup> | M/Z <sub>pred</sub> <sup>c</sup> | Int <sub>pred</sub> (Ag <sub>10</sub> <sup>6+</sup> ) <sup>d</sup> | Int <sub>pred</sub> (Ag <sub>10</sub> <sup>7+</sup> ) <sup>e</sup> | Int <sub>pred</sub> (Ag <sub>10</sub> <sup>5+</sup> ) <sup>f</sup> | ΔM/Z <sup>g</sup> | ΔInt(Ag <sub>10</sub> <sup>6+</sup> ) <sup>h</sup> | ΔInt(Ag <sub>10</sub> <sup>7+</sup> ) <sup>i</sup> | ΔInt(Ag <sub>10</sub> <sup>5+</sup> ) <sup>j</sup> |      |
| 1                               | 1320.1920                       | 0.17                             | 1320.1902                                                          | 0.01                                                               | 0.03                                                               | 0.00              | 1.36                                               | 0.16                                               | 0.15                                               | 0.17 |
| 2                               | 1320.3959                       | 0.10                             | 1320.3906                                                          | 0.03                                                               | 0.07                                                               | 0.01              | 4.00                                               | 0.07                                               | 0.02                                               | 0.08 |
| 3                               | 1320.5892                       | 0.18                             | 1320.5904                                                          | 0.07                                                               | 0.12                                                               | 0.03              | 0.89                                               | 0.11                                               | 0.06                                               | 0.16 |
| 4                               | 1320.7867                       | 0.20                             | 1320.7907                                                          | 0.12                                                               | 0.24                                                               | 0.07              | 3.01                                               | 0.08                                               | 0.04                                               | 0.13 |
| 5                               | 1320.9878                       | 0.34                             | 1320.9905                                                          | 0.24                                                               | 0.35                                                               | 0.12              | 2.07                                               | 0.10                                               | 0.01                                               | 0.22 |
| 6                               | 1321.1896                       | 0.43                             | 1321.1908                                                          | 0.35                                                               | 0.54                                                               | 0.24              | 0.88                                               | 0.08                                               | 0.11                                               | 0.19 |
| 7                               | 1321.3939                       | 0.61                             | 1321.3907                                                          | 0.54                                                               | 0.68                                                               | 0.35              | 2.43                                               | 0.07                                               | 0.07                                               | 0.26 |
| 8                               | 1321.5898                       | 0.71                             | 1321.5909                                                          | 0.68                                                               | 0.85                                                               | 0.54              | 0.80                                               | 0.03                                               | 0.14                                               | 0.17 |
| 9                               | 1321.7882                       | 0.87                             | 1321.7909                                                          | 0.85                                                               | 0.94                                                               | 0.68              | 2.00                                               | 0.01                                               | 0.07                                               | 0.19 |
| 10                              | 1321.9899                       | 0.95                             | 1321.9910                                                          | 0.94                                                               | 1.00                                                               | 0.85              | 0.82                                               | 0.01                                               | 0.05                                               | 0.10 |
| 11                              | 1322.1902                       | 1.00                             | 1322.1910                                                          | 1.00                                                               | 0.96                                                               | 0.94              | 0.62                                               | 0.00                                               | 0.04                                               | 0.06 |
| 12                              | 1322.3911                       | 0.94                             | 1322.3911                                                          | 0.96                                                               | 0.88                                                               | 1.00              | 0.03                                               | 0.02                                               | 0.07                                               | 0.06 |
| 13                              | 1322.5891                       | 0.86                             | 1322.5912                                                          | 0.88                                                               | 0.74                                                               | 0.96              | 1.60                                               | 0.01                                               | 0.13                                               | 0.10 |
| 14                              | 1322.7911                       | 0.72                             | 1322.7913                                                          | 0.74                                                               | 0.58                                                               | 0.88              | 0.17                                               | 0.02                                               | 0.14                                               | 0.16 |
| 15                              | 1322.9908                       | 0.60                             | 1322.9915                                                          | 0.58                                                               | 0.42                                                               | 0.74              | 0.49                                               | 0.02                                               | 0.18                                               | 0.13 |
| 16                              | 1323.1915                       | 0.53                             | 1323.1916                                                          | 0.42                                                               | 0.29                                                               | 0.58              | 0.06                                               | 0.10                                               | 0.24                                               | 0.05 |
| 17                              | 1323.3950                       | 0.36                             | 1323.3917                                                          | 0.29                                                               | 0.18                                                               | 0.42              | 2.47                                               | 0.07                                               | 0.17                                               | 0.07 |
| 18                              | 1323.5906                       | 0.27                             | 1323.5919                                                          | 0.18                                                               | 0.11                                                               | 0.29              | 0.98                                               | 0.09                                               | 0.16                                               | 0.02 |
| 19                              | 1323.7921                       | 0.19                             | 1323.7921                                                          | 0.11                                                               | 0.06                                                               | 0.18              | 0.01                                               | 0.08                                               | 0.13                                               | 0.00 |
| 20                              | 1323.9904                       | 0.12                             | 1323.9923                                                          | 0.06                                                               | 0.03                                                               | 0.11              | 1.44                                               | 0.06                                               | 0.09                                               | 0.01 |
| 21                              | 1324.1956                       | 0.16                             | 1324.1925                                                          | 0.03                                                               | 0.01                                                               | 0.06              | 2.31                                               | 0.13                                               | 0.14                                               | 0.10 |
| 22                              | 1650.9858                       | 0.14                             | 1650.9898                                                          | 0.07                                                               | 0.12                                                               | 0.03              | 2.42                                               | 0.06                                               | 0.02                                               | 0.11 |
| 23                              | 1651.2416                       | 0.19                             | 1651.2402                                                          | 0.12                                                               | 0.24                                                               | 0.07              | 0.87                                               | 0.07                                               | 0.05                                               | 0.12 |
| 24                              | 1651.4927                       | 0.31                             | 1651.4900                                                          | 0.24                                                               | 0.35                                                               | 0.12              | 1.64                                               | 0.07                                               | 0.04                                               | 0.19 |
| 25                              | 1651.7426                       | 0.43                             | 1651.7403                                                          | 0.35                                                               | 0.54                                                               | 0.24              | 1.41                                               | 0.08                                               | 0.11                                               | 0.19 |
| 26                              | 1651.9921                       | 0.59                             | 1651.9902                                                          | 0.54                                                               | 0.68                                                               | 0.35              | 1.16                                               | 0.05                                               | 0.09                                               | 0.24 |
| 27                              | 1652.2427                       | 0.74                             | 1652.2404                                                          | 0.68                                                               | 0.85                                                               | 0.54              | 1.40                                               | 0.06                                               | 0.11                                               | 0.20 |
| 28                              | 1652.4950                       | 0.91                             | 1652.4904                                                          | 0.85                                                               | 0.94                                                               | 0.68              | 2.80                                               | 0.05                                               | 0.03                                               | 0.23 |
| 29                              | 1652.7455                       | 0.94                             | 1652.7405                                                          | 0.94                                                               | 1.00                                                               | 0.85              | 3.00                                               | 0.00                                               | 0.06                                               | 0.09 |
| 30                              | 1652.9926                       | 1.00                             | 1652.9906                                                          | 1.00                                                               | 0.96                                                               | 0.94              | 1.22                                               | 0.00                                               | 0.04                                               | 0.06 |
| 31                              | 1653.2418                       | 0.98                             | 1653.2407                                                          | 0.96                                                               | 0.88                                                               | 1.00              | 0.64                                               | 0.02                                               | 0.11                                               | 0.02 |
| 32                              | 1653.4976                       | 0.91                             | 1653.4908                                                          | 0.88                                                               | 0.74                                                               | 0.96              | 4.09                                               | 0.03                                               | 0.17                                               | 0.05 |
| 33                              | 1653.7477                       | 0.76                             | 1653.7410                                                          | 0.74                                                               | 0.58                                                               | 0.88              | 4.06                                               | 0.02                                               | 0.18                                               | 0.12 |
| 34                              | 1653.9923                       | 0.61                             | 1653.9911                                                          | 0.58                                                               | 0.42                                                               | 0.74              | 0.71                                               | 0.03                                               | 0.18                                               | 0.13 |
| 35                              | 1654.2385                       | 0.51                             | 1654.2413                                                          | 0.42                                                               | 0.29                                                               | 0.58              | 1.69                                               | 0.09                                               | 0.22                                               | 0.07 |
| 36                              | 1654.5001                       | 0.38                             | 1654.4915                                                          | 0.29                                                               | 0.18                                                               | 0.42              | 5.20                                               | 0.09                                               | 0.19                                               | 0.05 |
| 37                              | 1654.7467                       | 0.25                             | 1654.7417                                                          | 0.18                                                               | 0.11                                                               | 0.29              | 3.02                                               | 0.06                                               | 0.14                                               | 0.04 |
| 38                              | 1654.9937                       | 0.14                             | 1654.9919                                                          | 0.11                                                               | 0.06                                                               | 0.18              | 1.07                                               | 0.04                                               | 0.08                                               | 0.04 |
| 39                              | 1655.2317                       | 0.18                             | 1655.2422                                                          | 0.06                                                               | 0.03                                                               | 0.11              | 6.34                                               | 0.12                                               | 0.15                                               | 0.07 |
|                                 |                                 |                                  |                                                                    |                                                                    |                                                                    |                   | 1.82                                               | 0.06                                               | 0.11                                               | 0.11 |

<sup>a</sup>Column 1: Observed M/Z values <sup>b</sup>Column 2: Observed and normalized intensities. The highlighted values (yellow) indicate the peak of the two distributions for the -4 and -5 charged complexes. <sup>c</sup>Column 3: Predicted M/Z values based on the molecular formula [C<sub>178</sub>H<sub>228</sub>O<sub>114</sub>N<sub>56</sub>P<sub>18</sub>Ag<sub>10</sub>]<sup>-4</sup> and [C<sub>178</sub>H<sub>227</sub>O<sub>114</sub>N<sub>56</sub>P<sub>18</sub>Ag<sub>10</sub>]<sup>-5</sup>, respectively. <sup>d</sup>Column 4: Predicted intensities based on a Ag<sub>10</sub><sup>6+</sup> adduct. <sup>e</sup>Column 5: Predicted intensities based on a Ag<sub>10</sub><sup>7+</sup> adduct. <sup>f</sup>Column 6: Predicted intensities based on a Ag<sub>10</sub><sup>5+</sup> adduct. <sup>g</sup>Column 7: Absolute differences in the observed and predicted M/Z values (|Column 1 – Column 3|). The observed average value of 1.82 ppm at the bottom of the column (red font) is within the precision of our instrument. <sup>h</sup>Column 8: Absolute differences in the observed and predicted intensities based on a Ag<sub>10</sub><sup>6+</sup> adduct (|Column 2 – Column 4|) <sup>i</sup>Column 9: Absolute differences in the observed and predicted intensities based on a Ag<sub>10</sub><sup>5+</sup> adduct (|Column 2 – Column 5|) <sup>j</sup>Column 10: Absolute differences in the observed and predicted intensities based on a Ag<sub>10</sub><sup>7+</sup> adduct (|Column 2 – Column 6|) For Columns 8-10, the highlighted (in yellow) entries are the peak of the distributions for the -4 and -5 charged ions. For Columns 8-10, the red values at the bottom of the columns are the averages of the absolute differences. The small value for the Ag<sub>10</sub><sup>6+</sup> adduct indicates this is the correct oxidation state for this cluster.

Table 4S: Summary of M/Z and Relative Intensities for the -4 (Entries 1-21) and -5 (Entries 22-39) of Hx-1/Ag<sub>10</sub><sup>6+</sup>/N<sub>3</sub>-C<sub>9</sub>H<sub>6</sub>-Biotin

|    | 1                               | 2                               | 3                                | 4                                                                  | 5                                                                  | 6                                                                  | 7                 | 8                                                  | 9                                                  | 10                                                 |
|----|---------------------------------|---------------------------------|----------------------------------|--------------------------------------------------------------------|--------------------------------------------------------------------|--------------------------------------------------------------------|-------------------|----------------------------------------------------|----------------------------------------------------|----------------------------------------------------|
|    | M/Z <sub>obs</sub> <sup>a</sup> | Int <sub>obs</sub> <sup>b</sup> | M/Z <sub>pred</sub> <sup>c</sup> | Int <sub>pred</sub> (Ag <sub>10</sub> <sup>6+</sup> ) <sup>d</sup> | Int <sub>pred</sub> (Ag <sub>10</sub> <sup>7+</sup> ) <sup>e</sup> | Int <sub>pred</sub> (Ag <sub>10</sub> <sup>5+</sup> ) <sup>f</sup> | ΔM/Z <sup>g</sup> | ΔInt(Ag <sub>10</sub> <sup>6+</sup> ) <sup>h</sup> | ΔInt(Ag <sub>10</sub> <sup>7+</sup> ) <sup>i</sup> | ΔInt(Ag <sub>10</sub> <sup>5+</sup> ) <sup>j</sup> |
| 1  | 1380.4125                       | 0.11                            | 1380.4165                        | 0.06                                                               | 0.11                                                               | 0.02                                                               | 2.89              | 0.05                                               | 0.00                                               | 0.09                                               |
| 2  | 1380.6115                       | 0.17                            | 1380.6168                        | 0.11                                                               | 0.22                                                               | 0.06                                                               | 3.82              | 0.06                                               | 0.05                                               | 0.11                                               |
| 3  | 1380.8169                       | 0.31                            | 1380.8167                        | 0.22                                                               | 0.33                                                               | 0.11                                                               | 0.18              | 0.09                                               | 0.01                                               | 0.20                                               |
| 4  | 1381.0173                       | 0.37                            | 1381.0169                        | 0.33                                                               | 0.50                                                               | 0.22                                                               | 0.32              | 0.04                                               | 0.13                                               | 0.15                                               |
| 5  | 1381.2167                       | 0.54                            | 1381.2168                        | 0.50                                                               | 0.65                                                               | 0.33                                                               | 0.08              | 0.03                                               | 0.12                                               | 0.21                                               |
| 6  | 1381.4170                       | 0.69                            | 1381.4170                        | 0.65                                                               | 0.83                                                               | 0.50                                                               | 0.03              | 0.04                                               | 0.14                                               | 0.19                                               |
| 7  | 1381.6169                       | 0.84                            | 1381.6170                        | 0.83                                                               | 0.93                                                               | 0.65                                                               | 0.05              | 0.01                                               | 0.09                                               | 0.19                                               |
| 8  | 1381.8173                       | 0.95                            | 1381.8171                        | 0.93                                                               | 1.00                                                               | 0.83                                                               | 0.15              | 0.02                                               | 0.05                                               | 0.12                                               |
| 9  | 1382.0173                       | 1.00                            | 1382.0171                        | 1.00                                                               | 0.98                                                               | 0.93                                                               | 0.12              | 0.00                                               | 0.02                                               | 0.07                                               |
| 10 | 1382.2189                       | 0.99                            | 1382.2173                        | 0.98                                                               | 0.91                                                               | 1.00                                                               | 1.19              | 0.01                                               | 0.08                                               | 0.01                                               |
| 11 | 1382.4186                       | 0.92                            | 1382.4173                        | 0.91                                                               | 0.78                                                               | 0.98                                                               | 0.92              | 0.01                                               | 0.14                                               | 0.06                                               |
| 12 | 1382.6171                       | 0.80                            | 1382.6174                        | 0.78                                                               | 0.63                                                               | 0.91                                                               | 0.25              | 0.02                                               | 0.17                                               | 0.11                                               |
| 13 | 1382.8175                       | 0.66                            | 1382.8176                        | 0.63                                                               | 0.47                                                               | 0.78                                                               | 0.04              | 0.03                                               | 0.18                                               | 0.13                                               |
| 14 | 1383.0236                       | 0.54                            | 1383.0177                        | 0.47                                                               | 0.33                                                               | 0.63                                                               | 4.28              | 0.06                                               | 0.20                                               | 0.09                                               |
| 15 | 1383.2185                       | 0.38                            | 1383.2178                        | 0.33                                                               | 0.22                                                               | 0.47                                                               | 0.49              | 0.05                                               | 0.16                                               | 0.09                                               |
| 16 | 1383.4219                       | 0.30                            | 1383.4180                        | 0.22                                                               | 0.13                                                               | 0.33                                                               | 2.84              | 0.08                                               | 0.16                                               | 0.04                                               |
| 17 | 1383.6174                       | 0.19                            | 1383.6182                        | 0.13                                                               | 0.08                                                               | 0.22                                                               | 0.54              | 0.05                                               | 0.11                                               | 0.03                                               |
| 18 | 1383.8149                       | 0.17                            | 1383.8183                        | 0.08                                                               | 0.04                                                               | 0.13                                                               | 2.49              | 0.10                                               | 0.13                                               | 0.04                                               |
| 19 | 1384.0308                       | 0.12                            | 1384.0186                        | 0.04                                                               | 0.02                                                               | 0.08                                                               | 8.85              | 0.08                                               | 0.10                                               | 0.05                                               |
| 20 | 1725.7677                       | 0.10                            | 1725.7724                        | 0.06                                                               | 0.11                                                               | 0.02                                                               | 2.74              | 0.03                                               | 0.01                                               | 0.08                                               |
| 21 | 1726.0206                       | 0.14                            | 1726.0228                        | 0.11                                                               | 0.22                                                               | 0.06                                                               | 1.26              | 0.03                                               | 0.08                                               | 0.08                                               |
| 22 | 1726.2714                       | 0.26                            | 1726.2726                        | 0.22                                                               | 0.33                                                               | 0.11                                                               | 0.71              | 0.04                                               | 0.07                                               | 0.15                                               |
| 23 | 1726.5228                       | 0.35                            | 1726.5229                        | 0.33                                                               | 0.50                                                               | 0.22                                                               | 0.05              | 0.03                                               | 0.15                                               | 0.13                                               |
| 24 | 1726.7726                       | 0.53                            | 1726.7728                        | 0.50                                                               | 0.65                                                               | 0.33                                                               | 0.13              | 0.02                                               | 0.12                                               | 0.20                                               |
| 25 | 1727.0234                       | 0.67                            | 1727.0230                        | 0.65                                                               | 0.83                                                               | 0.50                                                               | 0.22              | 0.01                                               | 0.16                                               | 0.16                                               |
| 26 | 1727.2722                       | 0.83                            | 1727.2730                        | 0.83                                                               | 0.93                                                               | 0.65                                                               | 0.48              | 0.01                                               | 0.10                                               | 0.18                                               |
| 27 | 1727.5234                       | 0.94                            | 1727.5232                        | 0.93                                                               | 1.00                                                               | 0.83                                                               | 0.13              | 0.01                                               | 0.06                                               | 0.11                                               |
| 28 | 1727.7731                       | 1.00                            | 1727.7732                        | 1.00                                                               | 0.98                                                               | 0.93                                                               | 1.31              | 0.04                                               | 0.10                                               | 0.11                                               |
| 29 | 1728.0236                       | 0.99                            | 1728.0234                        | 0.98                                                               | 0.91                                                               | 1.00                                                               | 1.31              | 0.04                                               | 0.10                                               | 0.11                                               |
| 30 | 1728.2743                       | 0.93                            | 1728.2735                        | 0.91                                                               | 0.78                                                               | 0.98                                                               | 1.31              | 0.04                                               | 0.10                                               | 0.11                                               |
| 31 | 1728.5236                       | 0.78                            | 1728.5236                        | 0.78                                                               | 0.63                                                               | 0.91                                                               | 1.31              | 0.04                                               | 0.10                                               | 0.11                                               |
| 32 | 1728.7734                       | 0.64                            | 1728.7738                        | 0.63                                                               | 0.47                                                               | 0.78                                                               | 1.25              | 0.04                                               | 0.11                                               | 0.11                                               |
| 33 | 1729.0242                       | 0.49                            | 1729.0239                        | 0.47                                                               | 0.33                                                               | 0.63                                                               | 1.17              | 0.04                                               | 0.11                                               | 0.11                                               |
| 34 | 1729.2744                       | 0.36                            | 1729.2741                        | 0.33                                                               | 0.22                                                               | 0.47                                                               | 1.20              | 0.04                                               | 0.11                                               | 0.11                                               |
| 35 | 1729.5244                       | 0.25                            | 1729.5243                        | 0.22                                                               | 0.13                                                               | 0.33                                                               | 1.23              | 0.03                                               | 0.11                                               | 0.11                                               |
| 36 | 1729.7766                       | 0.17                            | 1729.7745                        | 0.13                                                               | 0.08                                                               | 0.22                                                               | 1.27              | 0.03                                               | 0.11                                               | 0.11                                               |
| 37 | 1730.0239                       | 0.11                            | 1730.0247                        | 0.08                                                               | 0.04                                                               | 0.13                                                               | 1.31              | 0.03                                               | 0.11                                               | 0.10                                               |
| 38 | 1730.2748                       | 0.08                            | 1730.2750                        | 0.04                                                               | 0.02                                                               | 0.08                                                               | 1.35              | 0.04                                               | 0.11                                               | 0.10                                               |
| 39 | 1730.5214                       | 0.07                            | 1730.5253                        | 0.02                                                               | 0.01                                                               | 0.04                                                               | 1.39              | 0.04                                               | 0.11                                               | 0.10                                               |
|    |                                 |                                 |                                  |                                                                    |                                                                    |                                                                    | 1.30              | 0.04                                               | 0.11                                               | 0.11                                               |

<sup>a</sup>Column 1: Observed M/Z values <sup>b</sup>Column 2: Observed and normalized intensities. The highlighted values (yellow) indicate the peak of the two distributions for the -4 and -5 charged complexes. <sup>c</sup>Column 3: Predicted M/Z values based on the molecular formula [C<sub>191</sub>H<sub>249</sub>O<sub>117</sub>N<sub>59</sub>SP<sub>18</sub>Ag<sub>10</sub>]<sup>-4</sup> and [C<sub>191</sub>H<sub>248</sub>O<sub>117</sub>N<sub>59</sub>SP<sub>18</sub>Ag<sub>10</sub>]<sup>-5</sup>, respectively. <sup>d</sup>Column 4: Predicted intensities based on a Ag<sub>10</sub><sup>6+</sup> adduct. <sup>e</sup>Column 5: Predicted intensities based on a Ag<sub>10</sub><sup>7+</sup> adduct. <sup>f</sup>Column 6: Predicted intensities based on a Ag<sub>10</sub><sup>5+</sup> adduct. <sup>g</sup>Column 7: Absolute differences in the observed and predicted M/Z values (|Column 1 – Column 3|). The observed average value of 1.30 ppm at the bottom of the column (red font) is within the precision of our instrument. <sup>h</sup>Column 8: Absolute differences in the observed and predicted intensities based on a Ag<sub>10</sub><sup>6+</sup> adduct (|Column 2 – Column 4|). <sup>i</sup>Column 9: Absolute differences in the observed and predicted intensities based on a Ag<sub>10</sub><sup>5+</sup> adduct (|Column 2 – Column 5|). <sup>j</sup>Column 10: Absolute differences in the observed and predicted intensities based on a Ag<sub>10</sub><sup>7+</sup> adduct (|Column 2 – Column 6|). For Columns 8-10, the highlighted (in yellow) entries are the peak of the distributions for the -4 and -5 charged ions. For Columns 8-10, the red values at the bottom of the columns are the averages of the absolute differences. The small value for the Ag<sub>10</sub><sup>6+</sup> adduct indicates this is the correct oxidation state for this cluster.

Table 55: Summary of M/Z and Relative Intensities for the -5 (Entries 1-9) and -4 (Entries 10-17) and -3 (Entries 18-26) of Hx-1/Ag<sub>10</sub><sup>6+</sup>/CN<sup>-</sup> in D<sub>2</sub>O

|    | 1                               | 2                               | 3                                | 4                                | 5                                  | 6                 | 7                 | 8                              |
|----|---------------------------------|---------------------------------|----------------------------------|----------------------------------|------------------------------------|-------------------|-------------------|--------------------------------|
|    | M/Z <sub>obs</sub> <sup>a</sup> | Int <sub>obs</sub> <sup>b</sup> | M/Z <sub>pred</sub> <sup>c</sup> | Int <sub>pred</sub> <sup>d</sup> | Int <sub>pred-D</sub> <sup>e</sup> | ΔM/Z <sup>f</sup> | ΔInt <sup>g</sup> | ΔInt <sub>D</sub> <sup>h</sup> |
| 1  | 1086.9691                       | 0.09                            | 1086.9774                        | 0.39                             | 0.00                               | 7.67              | 0.30              | 0.09                           |
| 2  | 1087.1743                       | 0.48                            | 1087.1780                        | 0.85                             | 0.39                               | 3.41              | 0.37              | 0.09                           |
| 3  | 1087.3755                       | 0.86                            | 1087.3786                        | 1.00                             | 0.85                               | 2.80              | 0.14              | 0.01                           |
| 4  | 1087.5754                       | 1.00                            | 1087.5791                        | 0.84                             | 1.00                               | 3.37              | 0.16              | 0.00                           |
| 5  | 1087.7742                       | 0.85                            | 1087.7796                        | 0.57                             | 0.84                               | 4.96              | 0.28              | 0.00                           |
| 6  | 1087.9769                       | 0.55                            | 1087.9801                        | 0.32                             | 0.57                               | 2.94              | 0.23              | 0.01                           |
| 7  | 1088.1770                       | 0.33                            | 1088.1806                        | 0.16                             | 0.32                               | 3.31              | 0.18              | 0.01                           |
| 8  | 1088.3795                       | 0.18                            | 1088.3811                        | 0.07                             | 0.16                               | 1.47              | 0.11              | 0.02                           |
| 9  | 1088.5814                       | 0.13                            | 1088.5816                        | 0.03                             | 0.07                               | 0.17              | 0.10              | 0.06                           |
| 10 | 1358.9747                       | 0.11                            | 1358.9736                        | 0.39                             | 0.00                               | 0.79              | 0.28              | 0.11                           |
| 11 | 1359.2273                       | 0.50                            | 1359.2243                        | 0.85                             | 0.39                               | 2.19              | 0.35              | 0.11                           |
| 12 | 1359.4784                       | 0.90                            | 1359.4750                        | 1.00                             | 0.85                               | 2.50              | 0.10              | 0.05                           |
| 13 | 1359.7286                       | 1.00                            | 1359.7257                        | 0.84                             | 1.00                               | 2.16              | 0.16              | 0.00                           |
| 14 | 1359.9783                       | 0.84                            | 1359.9763                        | 0.57                             | 0.84                               | 1.46              | 0.28              | 0.00                           |
| 15 | 1360.2296                       | 0.57                            | 1360.2269                        | 0.32                             | 0.57                               | 1.96              | 0.25              | 0.01                           |
| 16 | 1360.4796                       | 0.34                            | 1360.4776                        | 0.16                             | 0.32                               | 1.49              | 0.19              | 0.02                           |
| 17 | 1360.7317                       | 0.19                            | 1360.7282                        | 0.07                             | 0.16                               | 2.58              | 0.12              | 0.03                           |
| 18 | 1812.3077                       | 0.11                            | 1812.3006                        | 0.39                             | 0.00                               | 3.93              | 0.28              | 0.11                           |
| 19 | 1812.6486                       | 0.43                            | 1812.6349                        | 0.85                             | 0.39                               | 7.58              | 0.42              | 0.03                           |
| 20 | 1812.9767                       | 0.82                            | 1812.9691                        | 1.00                             | 0.85                               | 4.19              | 0.18              | 0.03                           |
| 21 | 1813.3069                       | 1.00                            | 1813.3033                        | 0.84                             | 1.00                               | 1.98              | 0.16              | 0.00                           |
| 22 | 1813.6401                       | 0.84                            | 1813.6375                        | 0.57                             | 0.84                               | 1.43              | 0.28              | 0.00                           |
| 23 | 1813.9747                       | 0.56                            | 1813.9717                        | 0.32                             | 0.57                               | 1.66              | 0.24              | 0.00                           |
| 24 | 1814.3063                       | 0.33                            | 1814.3059                        | 0.16                             | 0.32                               | 0.25              | 0.18              | 0.01                           |
| 25 | 1814.6498                       | 0.19                            | 1814.6400                        | 0.07                             | 0.16                               | 2.76              | 0.22              | 0.03                           |
| 26 | 1814.9845                       | 0.10                            | 1814.9742                        | 0.03                             | 0.07                               | 2.76              | 0.22              | 0.03                           |
|    |                                 |                                 |                                  |                                  |                                    | 2.76              | 0.22              | 0.03                           |

<sup>a</sup>Column 1: Observed M/Z values <sup>b</sup>Column 2: Observed and normalized intensities. The highlighted values (yellow) indicate the peak of the two distributions for the -3, -4 and -5 charged complexes. <sup>c</sup>Column 3: Predicted M/Z values based on the molecular formulas and [C<sub>175</sub>H<sub>226</sub>O<sub>113</sub>N<sub>53</sub>P<sub>18</sub>]<sup>3+</sup>, [C<sub>175</sub>H<sub>227</sub>O<sub>113</sub>N<sub>53</sub>P<sub>18</sub>]<sup>4+</sup>, and [C<sub>175</sub>H<sub>226</sub>O<sub>113</sub>N<sub>53</sub>P<sub>18</sub>]<sup>5+</sup> for the fully protonated DNA and [C<sub>175</sub>H<sub>227</sub>DO<sub>113</sub>N<sub>53</sub>P<sub>18</sub>]<sup>3+</sup>, [C<sub>175</sub>H<sub>226</sub>DO<sub>113</sub>N<sub>53</sub>P<sub>18</sub>]<sup>4+</sup>, and [C<sub>175</sub>H<sub>225</sub>DO<sub>113</sub>N<sub>53</sub>P<sub>18</sub>]<sup>5+</sup> for the singly deuterated DNA. <sup>d</sup>Column 4: Predicted intensities based on a fully protonated Hx-1. <sup>e</sup>Column 5: Predicted intensities based on a singly deuterated Hx-1. <sup>f</sup>Column 6: Absolute differences in the observed and predicted M/Z values (|Column 1 – Column 3|). The observed average value of 2.76 ppm at the bottom of the column (red font) is within the precision of our instrument. <sup>g</sup>Column 7: Absolute differences in the observed and predicted intensities based on a fully protonated Hx-1. (|Column 2 – Column 4|) <sup>h</sup>Column 8: Absolute differences in the observed and predicted intensities based on a singly deuterated Hx-1 (|Column 2 – Column 5|).

Table 65: Summary of M/Z and Relative Intensities for the -5 (Entries 1-10) and -4 (Entries 11-19) and -3 (Entries 20-29) of Hx-1/Ag<sub>10</sub><sup>6+</sup>/CN<sup>-</sup> in H<sub>2</sub>O

|    | 1                               | 2                               | 3                                | 4                                | 5                                  | 6                 | 7                 | 8                              |
|----|---------------------------------|---------------------------------|----------------------------------|----------------------------------|------------------------------------|-------------------|-------------------|--------------------------------|
|    | M/Z <sub>obs</sub> <sup>a</sup> | Int <sub>obs</sub> <sup>b</sup> | M/Z <sub>pred</sub> <sup>c</sup> | Int <sub>pred</sub> <sup>d</sup> | Int <sub>pred-D</sub> <sup>e</sup> | ΔM/Z <sup>f</sup> | ΔInt <sup>g</sup> | ΔInt <sub>D</sub> <sup>h</sup> |
| 1  | 1086.7484                       | 0.05                            | 1086.7759                        | 0.00                             | 0.00                               | 25.28             | 0.05              | 0.05                           |
| 2  | 1086.9728                       | 0.42                            | 1086.9774                        | 0.39                             | 0.00                               | 4.27              | 0.03              | 0.42                           |
| 3  | 1087.1741                       | 0.86                            | 1087.1780                        | 0.85                             | 0.39                               | 3.60              | 0.01              | 0.47                           |
| 4  | 1087.3749                       | 1.00                            | 1087.3786                        | 1.00                             | 0.85                               | 3.36              | 0.00              | 0.15                           |
| 5  | 1087.5762                       | 0.87                            | 1087.5791                        | 0.84                             | 1.00                               | 2.64              | 0.02              | 0.13                           |
| 6  | 1087.7754                       | 0.58                            | 1087.7796                        | 0.57                             | 0.84                               | 3.85              | 0.02              | 0.26                           |
| 7  | 1087.9763                       | 0.34                            | 1087.9801                        | 0.32                             | 0.57                               | 3.49              | 0.02              | 0.23                           |
| 8  | 1088.1780                       | 0.18                            | 1088.1806                        | 0.16                             | 0.32                               | 2.39              | 0.02              | 0.14                           |
| 9  | 1088.3794                       | 0.09                            | 1088.3811                        | 0.07                             | 0.16                               | 1.56              | 0.03              | 0.06                           |
| 10 | 1088.5906                       | 0.07                            | 1088.5816                        | 0.03                             | 0.07                               | 8.28              | 0.05              | 0.00                           |
| 11 | 1358.7305                       | 0.04                            | 1358.7217                        | 0.00                             | 0.00                               | 6.51              | 0.04              | 0.04                           |
| 12 | 1358.9763                       | 0.44                            | 1358.9736                        | 0.39                             | 0.00                               | 1.97              | 0.04              | 0.44                           |
| 13 | 1359.2262                       | 0.87                            | 1359.2243                        | 0.85                             | 0.39                               | 1.38              | 0.03              | 0.48                           |
| 14 | 1359.4774                       | 1.00                            | 1359.4750                        | 1.00                             | 0.85                               | 1.77              | 0.00              | 0.15                           |
| 15 | 1359.7278                       | 0.86                            | 1359.7257                        | 0.84                             | 1.00                               | 1.57              | 0.01              | 0.14                           |
| 16 | 1359.9781                       | 0.58                            | 1359.9763                        | 0.57                             | 0.84                               | 1.32              | 0.02              | 0.26                           |
| 17 | 1360.2291                       | 0.34                            | 1360.2269                        | 0.32                             | 0.57                               | 1.59              | 0.02              | 0.22                           |
| 18 | 1360.4788                       | 0.18                            | 1360.4776                        | 0.16                             | 0.32                               | 0.90              | 0.02              | 0.14                           |
| 19 | 1360.7299                       | 0.09                            | 1360.7282                        | 0.07                             | 0.16                               | 1.26              | 0.02              | 0.07                           |
| 20 | 1812.0072                       | 0.01                            | 1811.9646                        | 0.00                             | 0.00                               | 23.49             | 0.01              | 0.01                           |
| 21 | 1812.3123                       | 0.34                            | 1812.3006                        | 0.39                             | 0.00                               | 6.47              | 0.05              | 0.34                           |
| 22 | 1812.6417                       | 0.76                            | 1812.6349                        | 0.85                             | 0.39                               | 3.77              | 0.08              | 0.37                           |
| 23 | 1812.9717                       | 1.00                            | 1812.9691                        | 1.00                             | 0.85                               | 1.43              | 0.00              | 0.15                           |
| 24 | 1813.3073                       | 0.84                            | 1813.3033                        | 0.84                             | 1.00                               | 2.20              | 0.00              | 0.16                           |
| 25 | 1813.6444                       | 0.55                            | 1813.6375                        | 0.57                             | 0.84                               | 3.80              | 0.01              | 0.29                           |
| 26 | 1813.9744                       | 0.31                            | 1813.9717                        | 0.32                             | 0.57                               | 1.50              | 0.01              | 0.26                           |
| 27 | 1814.3068                       | 0.15                            | 1814.3059                        | 0.16                             | 0.32                               | 0.52              | 0.00              | 0.16                           |
| 28 | 1814.6475                       | 0.08                            | 1814.6400                        | 0.07                             | 0.16                               | 4.13              | 0.01              | 0.08                           |
| 29 | 1814.9812                       | 0.04                            | 1814.9742                        | 0.03                             | 0.07                               | 3.87              | 0.02              | 0.03                           |
|    |                                 |                                 |                                  |                                  |                                    | 4.42              | 0.02              | 0.20                           |

<sup>a</sup>Column 1: Observed M/Z values <sup>b</sup>Column 2: Observed and normalized intensities. The highlighted values (yellow) indicate the peak of the two distributions for the -3, -4 and -5 charged complexes. <sup>c</sup>Column 3: Predicted M/Z values based on the molecular formulas and [C<sub>175</sub>H<sub>226</sub>O<sub>113</sub>N<sub>53</sub>P<sub>18</sub>]<sup>3+</sup>, [C<sub>175</sub>H<sub>227</sub>O<sub>113</sub>N<sub>53</sub>P<sub>18</sub>]<sup>4+</sup>, and [C<sub>175</sub>H<sub>226</sub>O<sub>113</sub>N<sub>53</sub>P<sub>18</sub>]<sup>5+</sup> for the fully protonated DNA and [C<sub>175</sub>H<sub>227</sub>DO<sub>113</sub>N<sub>53</sub>P<sub>18</sub>]<sup>3+</sup>, [C<sub>175</sub>H<sub>226</sub>DO<sub>113</sub>N<sub>53</sub>P<sub>18</sub>]<sup>4+</sup>, and [C<sub>175</sub>H<sub>225</sub>DO<sub>113</sub>N<sub>53</sub>P<sub>18</sub>]<sup>5+</sup> for the singly deuterated DNA. <sup>d</sup>Column 4: Predicted intensities based on a fully protonated Hx-1. <sup>e</sup>Column 5: Predicted intensities based on a singly deuterated Hx-1. <sup>f</sup>Column 6: Absolute differences in the observed and predicted M/Z values (|Column 1 – Column 3|). The observed average value of 4.42 ppm at the bottom of the column (red font) is within the precision of our instrument. <sup>g</sup>Column 7: Absolute differences in the observed and predicted intensities based on a fully protonated Hx-1. (|Column 2 – Column 4|) <sup>h</sup>Column 8: Absolute differences in the observed and predicted intensities based on a singly deuterated Hx-1 (|Column 2 – Column 5|).

Table 75: Summary of M/Z and Relative Intensities for the -5 (Entries 1-11) and -4 (Entries 12-23) and -3 (Entries 24-33) of 1/Ag<sub>10</sub><sup>6+</sup>/CN<sup>-</sup> in D<sub>2</sub>O

|    | 1                               | 2                               | 3                                | 4                                | 5                                  | 6                 | 7                 | 8                              |
|----|---------------------------------|---------------------------------|----------------------------------|----------------------------------|------------------------------------|-------------------|-------------------|--------------------------------|
|    | M/Z <sub>obs</sub> <sup>a</sup> | Int <sub>obs</sub> <sup>b</sup> | M/Z <sub>pred</sub> <sup>c</sup> | Int <sub>pred</sub> <sup>d</sup> | Int <sub>pred-D</sub> <sup>e</sup> | ΔM/Z <sup>f</sup> | ΔInt <sup>g</sup> | ΔInt <sub>D</sub> <sup>h</sup> |
| 1  | 1054.7461                       | 0.06                            | 1054.7701                        | 0.00                             | 0.00                               | 22.74             | 0.06              | 0.06                           |
| 2  | 1054.9674                       | 0.44                            | 1054.9717                        | 0.42                             | 0.00                               | 4.03              | 0.02              | 0.44                           |
| 3  | 1055.1683                       | 0.87                            | 1055.1722                        | 0.87                             | 0.42                               | 3.72              | 0.00              | 0.46                           |
| 4  | 1055.3693                       | 1.00                            | 1055.3728                        | 1.00                             | 0.87                               | 3.27              | 0.00              | 0.13                           |
| 5  | 1055.5701                       | 0.87                            | 1055.5733                        | 0.82                             | 1.00                               | 3.01              | 0.05              | 0.13                           |
| 6  | 1055.7698                       | 0.59                            | 1055.7738                        | 0.54                             | 0.82                               | 3.78              | 0.05              | 0.23                           |
| 7  | 1055.9708                       | 0.34                            | 1055.9743                        | 0.29                             | 0.54                               | 3.31              | 0.05              | 0.19                           |
| 8  | 1056.1710                       | 0.20                            | 1056.1748                        | 0.14                             | 0.29                               | 3.59              | 0.06              | 0.10                           |
| 9  | 1056.3723                       | 0.10                            | 1056.3753                        | 0.06                             | 0.14                               | 2.83              | 0.04              | 0.04                           |
| 10 | 1056.5708                       | 0.07                            | 1056.5758                        | 0.02                             | 0.06                               | 4.71              | 0.05              | 0.01                           |
| 11 | 1056.7673                       | 0.03                            | 1056.7763                        | 0.01                             | 0.02                               | 8.48              | 0.03              | 0.01                           |
| 12 | 1318.7279                       | 0.04                            | 1318.7144                        | 0.00                             | 0.00                               | 10.21             | 0.04              | 0.04                           |
| 13 | 1318.9686                       | 0.45                            | 1318.9664                        | 0.42                             | 0.00                               | 1.68              | 0.03              | 0.45                           |
| 14 | 1319.2194                       | 0.87                            | 1319.2171                        | 0.87                             | 0.42                               | 1.75              | 0.00              | 0.45                           |
| 15 | 1319.4695                       | 1.00                            | 1319.4678                        | 1.00                             | 0.87                               | 1.32              | 0.00              | 0.13                           |
| 16 | 1319.7198                       | 0.85                            | 1319.7184                        | 0.82                             | 1.00                               | 1.05              | 0.03              | 0.15                           |
| 17 | 1319.9702                       | 0.59                            | 1319.9691                        | 0.54                             | 0.82                               | 0.86              | 0.05              | 0.23                           |
| 18 | 1320.2211                       | 0.35                            | 1320.2197                        | 0.29                             | 0.54                               | 1.07              | 0.06              | 0.19                           |
| 19 | 1320.4717                       | 0.19                            | 1320.4703                        | 0.14                             | 0.29                               | 1.05              | 0.05              | 0.10                           |
| 20 | 1320.7220                       | 0.10                            | 1320.7209                        | 0.06                             | 0.14                               | 0.81              | 0.04              | 0.04                           |
| 21 | 1320.9716                       | 0.05                            | 1320.9715                        | 0.02                             | 0.06                               | 0.05              | 0.03              | 0.01                           |
| 22 | 1321.2220                       | 0.03                            | 1321.2222                        | 0.01                             | 0.02                               | 0.11              | 0.02              | 0.00                           |
| 23 | 1758.6714                       | 0.01                            | 1758.6217                        | 0.00                             | 0.00                               | 28.28             | 0.01              | 0.01                           |
| 24 | 1758.9690                       | 0.35                            | 1758.9576                        | 0.42                             | 0.00                               | 6.48              | 0.06              | 0.35                           |
| 25 | 1759.3005                       | 0.79                            | 1759.2919                        | 0.87                             | 0.42                               | 4.90              | 0.08              | 0.38                           |
| 26 | 1759.6307                       | 1.00                            | 1759.6261                        | 1.00                             | 0.87                               | 2.61              | 0.00              | 0.13                           |
| 27 | 1759.9648                       | 0.86                            | 1759.9603                        | 0.82                             | 1.00                               | 2.55              | 0.04              | 0.14                           |
| 28 | 1760.2992                       | 0.57                            | 1760.2945                        | 0.54                             | 0.82                               | 2.67              | 0.03              | 0.26                           |
| 29 | 1760.6305                       | 0.32                            | 1760.6287                        | 0.29                             | 0.54                               | 1.04              | 0.03              | 0.21                           |
| 30 | 1760.9679                       | 0.17                            | 1760.9628                        | 0.14                             | 0.30                               | 2.87              | 0.03              | 0.13                           |
| 31 | 1761.2981                       | 0.09                            | 1761.2970                        | 0.06                             | 0.14                               | 0.62              | 0.03              | 0.05                           |
| 32 | 1761.6373                       | 0.05                            | 1761.6312                        | 0.02                             | 0.06                               | 3.49              | 0.03              | 0.01                           |
| 33 | 1761.9739                       | 0.03                            | 1761.9653                        | 0.01                             | 0.02                               | 4.89              | 0.02              | 0.01                           |
|    |                                 |                                 |                                  |                                  |                                    | 4.36              | 0.03              | 0.16                           |

<sup>a</sup>Column 1: Observed M/Z values <sup>b</sup>Column 2: Observed and normalized intensities. The highlighted values (yellow) indicate the peak of the two distributions for the -3, -4 and -5 charged complexes. <sup>c</sup>Column 3: Predicted M/Z values based on the molecular formulas [C<sub>169</sub>H<sub>219</sub>O<sub>110</sub>N<sub>53</sub>P<sub>17</sub>]<sup>3+</sup>, [C<sub>169</sub>H<sub>218</sub>O<sub>110</sub>N<sub>53</sub>P<sub>17</sub>]<sup>4+</sup>, and [C<sub>169</sub>H<sub>217</sub>O<sub>110</sub>N<sub>53</sub>P<sub>17</sub>]<sup>5+</sup> for the fully protonated DNA and [C<sub>169</sub>H<sub>218</sub>DO<sub>110</sub>N<sub>53</sub>P<sub>17</sub>]<sup>3+</sup>, [C<sub>169</sub>H<sub>217</sub>DO<sub>110</sub>N<sub>53</sub>P<sub>17</sub>]<sup>4+</sup>, and [C<sub>169</sub>H<sub>216</sub>DO<sub>110</sub>N<sub>53</sub>P<sub>17</sub>]<sup>5+</sup> for the singly deuterated DNA. <sup>d</sup>Column 4: Predicted intensities based on a fully protonated 1. <sup>e</sup>Column 5: Predicted intensities based on a singly deuterated 1. <sup>f</sup>Column 6: Absolute differences in the observed and predicted M/Z values (|Column 1 – Column 3|). The observed average value of 4.36 ppm at the bottom of the column (red font) is within the precision of our instrument. <sup>g</sup>Column 7: Absolute differences in the observed and predicted intensities based on a fully protonated 1. (|Column 2 – Column 4|) <sup>h</sup>Column 8: Absolute differences in the observed and predicted intensities based on a singly deuterated 1. (|Column 2 – Column 5|).

Table 85: Summary of M/Z and Relative Intensities for the -5 (Entries 1-10) and -4 (Entries 11-19) and -3 (Entries 20-29) of Hx-1/CN<sup>-</sup> in D<sub>2</sub>O

|    | 1                               | 2                               | 3                                | 4                                | 5                                  | 6                 | 7                 | 8                              |
|----|---------------------------------|---------------------------------|----------------------------------|----------------------------------|------------------------------------|-------------------|-------------------|--------------------------------|
|    | M/Z <sub>obs</sub> <sup>a</sup> | Int <sub>obs</sub> <sup>b</sup> | M/Z <sub>pred</sub> <sup>c</sup> | Int <sub>pred</sub> <sup>d</sup> | Int <sub>pred-D</sub> <sup>e</sup> | ΔM/Z <sup>f</sup> | ΔInt <sup>g</sup> | ΔInt <sub>D</sub> <sup>h</sup> |
| 1  | 1086.7208                       | 0.12                            | 1086.7759                        | 0.00                             | 0.00                               | 50.67             | 0.12              | 0.12                           |
| 2  | 1086.9724                       | 0.36                            | 1086.9774                        | 0.39                             | 0.00                               | 4.64              | 0.03              | 0.36                           |
| 3  | 1087.1736                       | 0.82                            | 1087.1780                        | 0.85                             | 0.39                               | 4.06              | 0.03              | 0.43                           |
| 4  | 1087.3759                       | 1.00                            | 1087.3786                        | 1.00                             | 0.85                               | 2.44              | 0.00              | 0.15                           |
| 5  | 1087.5751                       | 0.95                            | 1087.5791                        | 0.84                             | 1.00                               | 3.65              | 0.11              | 0.05                           |
| 6  | 1087.7732                       | 0.70                            | 1087.7796                        | 0.57                             | 0.84                               | 5.87              | 0.14              | 0.14                           |
| 7  | 1087.9760                       | 0.40                            | 1087.9801                        | 0.32                             | 0.57                               | 3.77              | 0.08              | 0.17                           |
| 8  | 1088.1781                       | 0.21                            | 1088.1806                        | 0.16                             | 0.32                               | 2.30              | 0.06              | 0.11                           |
| 9  | 1088.3784                       | 0.12                            | 1088.3811                        | 0.07                             | 0.16                               | 2.48              | 0.05              | 0.04                           |
| 10 | 1088.5780                       | 0.09                            | 1088.5816                        | 0.03                             | 0.07                               | 3.30              | 0.06              | 0.02                           |
| 11 | 1358.7218                       | 0.02                            | 1358.7217                        | 0.00                             | 0.00                               | 0.10              | 0.02              | 0.02                           |
| 12 | 1358.9740                       | 0.37                            | 1358.9736                        | 0.39                             | 0.00                               | 0.28              | 0.02              | 0.37                           |
| 13 | 1359.2251                       | 0.81                            | 1359.2243                        | 0.85                             | 0.39                               | 0.57              | 0.04              | 0.42                           |
| 14 | 1359.4760                       | 1.00                            | 1359.4750                        | 1.00                             | 0.85                               | 0.74              | 0.00              | 0.15                           |
| 15 | 1359.7260                       | 0.90                            | 1359.7257                        | 0.84                             | 1.00                               | 0.25              | 0.05              | 0.10                           |
| 16 | 1359.9767                       | 0.65                            | 1359.9763                        | 0.57                             | 0.84                               | 0.29              | 0.08              | 0.20                           |
| 17 | 1360.2269                       | 0.38                            | 1360.2269                        | 0.32                             | 0.57                               | 0.03              | 0.06              | 0.18                           |
| 18 | 1360.4780                       | 0.20                            | 1360.4776                        | 0.16                             | 0.32                               | 0.32              | 0.04              | 0.12                           |
| 19 | 1360.7296                       | 0.10                            | 1360.7282                        | 0.07                             | 0.16                               | 1.04              | 0.03              | 0.05                           |
| 20 | 1812.0123                       | 0.01                            | 1811.9646                        | 0.00                             | 0.00                               | 26.30             | 0.01              | 0.01                           |
| 21 | 1812.3044                       | 0.34                            | 1812.3006                        | 0.39                             | 0.00                               | 2.11              | 0.05              | 0.34                           |
| 22 | 1812.6399                       | 0.76                            | 1812.6349                        | 0.85                             | 0.39                               | 2.78              | 0.08              | 0.37                           |
| 23 | 1812.9741                       | 1.00                            | 1812.9691                        | 1.00                             | 0.85                               | 2.76              | 0.00              | 0.15                           |
| 24 | 1813.3046                       | 0.91                            | 1813.3033                        | 0.84                             | 1.00                               | 0.71              | 0.07              | 0.09                           |
| 25 | 1813.6367                       | 0.66                            | 1813.6375                        | 0.57                             | 0.84                               | 0.44              | 0.09              | 0.19                           |
| 26 | 1813.9707                       | 0.38                            | 1813.9717                        | 0.32                             | 0.57                               | 0.54              | 0.07              | 0.18                           |
| 27 | 1814.3026                       | 0.22                            | 1814.3059                        | 0.16                             | 0.32                               | 1.79              | 0.07              | 0.10                           |
| 28 | 1814.6400                       | 0.12                            | 1814.6400                        | 0.07                             | 0.16                               | 0.01              | 0.05              | 0.04                           |
| 29 | 1814.9807                       | 0.07                            | 1814.9742                        | 0.03                             | 0.07                               | 3.60              | 0.04              | 0.00                           |
|    |                                 |                                 |                                  |                                  |                                    | 4.41              | 0.05              | 0.16                           |

<sup>a</sup>Column 1: Observed M/Z values <sup>b</sup>Column 2: Observed and normalized intensities. The highlighted values (yellow) indicate the peak of the two distributions for the -3, -4 and -5 charged complexes. <sup>c</sup>Column 3: Predicted M/Z values based on the molecular formulas [C<sub>175</sub>H<sub>228</sub>O<sub>113</sub>N<sub>53</sub>P<sub>18</sub>]<sup>3+</sup>, [C<sub>175</sub>H<sub>227</sub>O<sub>113</sub>N<sub>53</sub>P<sub>18</sub>]<sup>4+</sup>, and [C<sub>175</sub>H<sub>226</sub>O<sub>113</sub>N<sub>53</sub>P<sub>18</sub>]<sup>5+</sup> for the fully protonated DNA and [C<sub>175</sub>H<sub>227</sub>DO<sub>113</sub>N<sub>53</sub>P<sub>18</sub>]<sup>3+</sup>, [C<sub>175</sub>H<sub>226</sub>DO<sub>113</sub>N<sub>53</sub>P<sub>18</sub>]<sup>4+</sup>, and [C<sub>175</sub>H<sub>225</sub>DO<sub>113</sub>N<sub>53</sub>P<sub>18</sub>]<sup>5+</sup> for the singly deuterated DNA. <sup>d</sup>Column 4: Predicted intensities based on a fully protonated Hx-1. <sup>e</sup>Column 5: Predicted intensities based on a singly deuterated Hx-1. <sup>f</sup>Column 6: Absolute differences in the observed and predicted M/Z values (|Column 1 – Column 3|). The observed average value of 4.41 ppm at the bottom of the column (red font) is within the precision of our instrument. <sup>g</sup>Column 7: Absolute differences in the observed and predicted intensities based on a fully protonated Hx-1. (|Column 2 – Column 4|) <sup>h</sup>Column 8: Absolute differences in the observed and predicted intensities based on a singly deuterated Hx-1. (|Column 2 – Column 5|).

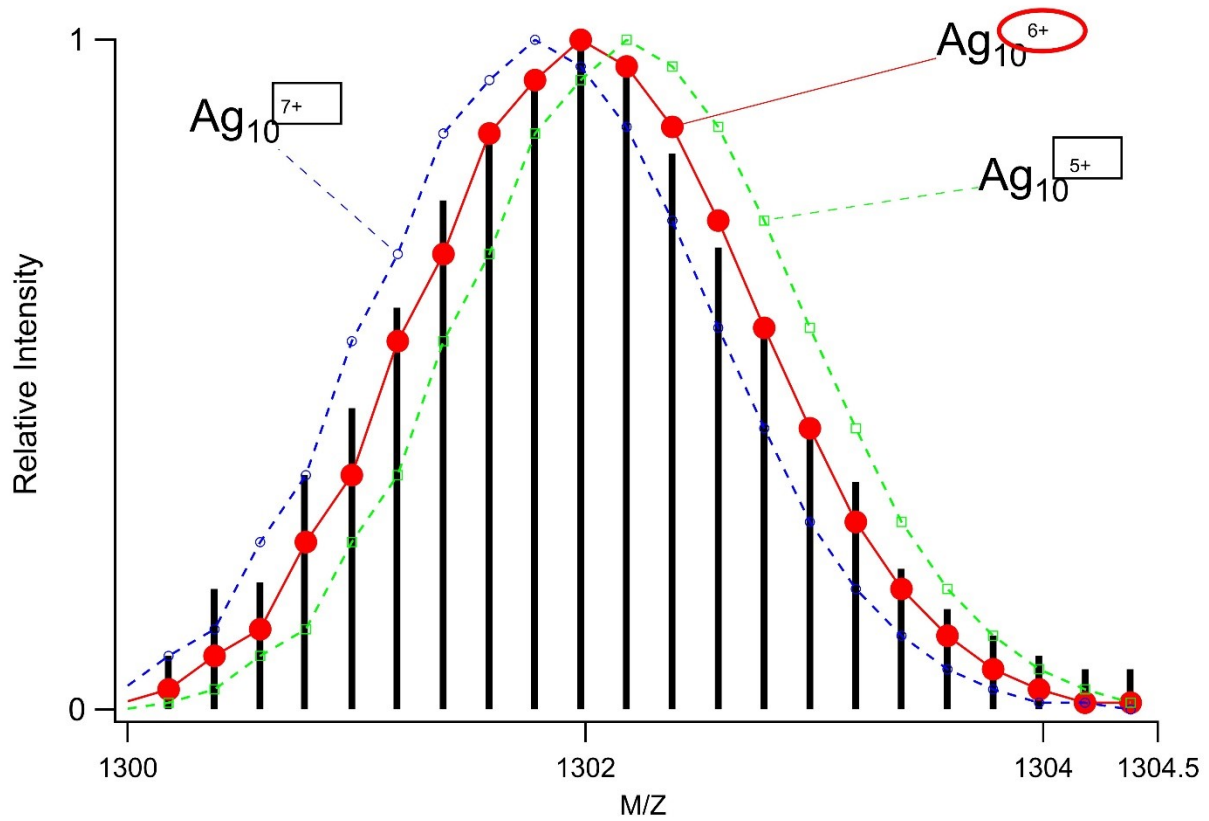

Figure 1S: Isotope models for based on the formulas  $[(C_{175}H_{221}N_{53}O_{113}P_{18})^{-10}(Ag_{10}^{6+})^{-4}]^{-4}$  (red closed circles),  $[(C_{175}H_{220}N_{53}O_{113}P_{18})^{-10}(Ag_{10}^{7+})^{-4}]^{-4}$  (blue open circles), and  $[(C_{175}H_{222}N_{53}O_{113}P_{18})^{-10}(Ag_{10}^{6+})^{-4}]^{-4}$  (green closed squares). Underlined subscripts emphasize the numbers of  $H^+$ , which are used to determine the oxidation state of the  $Ag_{10}$ . These charges are emphasized by black boxes and a red circle. The black sticks represent the experimental spectrum, which is best described by the  $Ag_{10}^{6+}$  distribution (red).



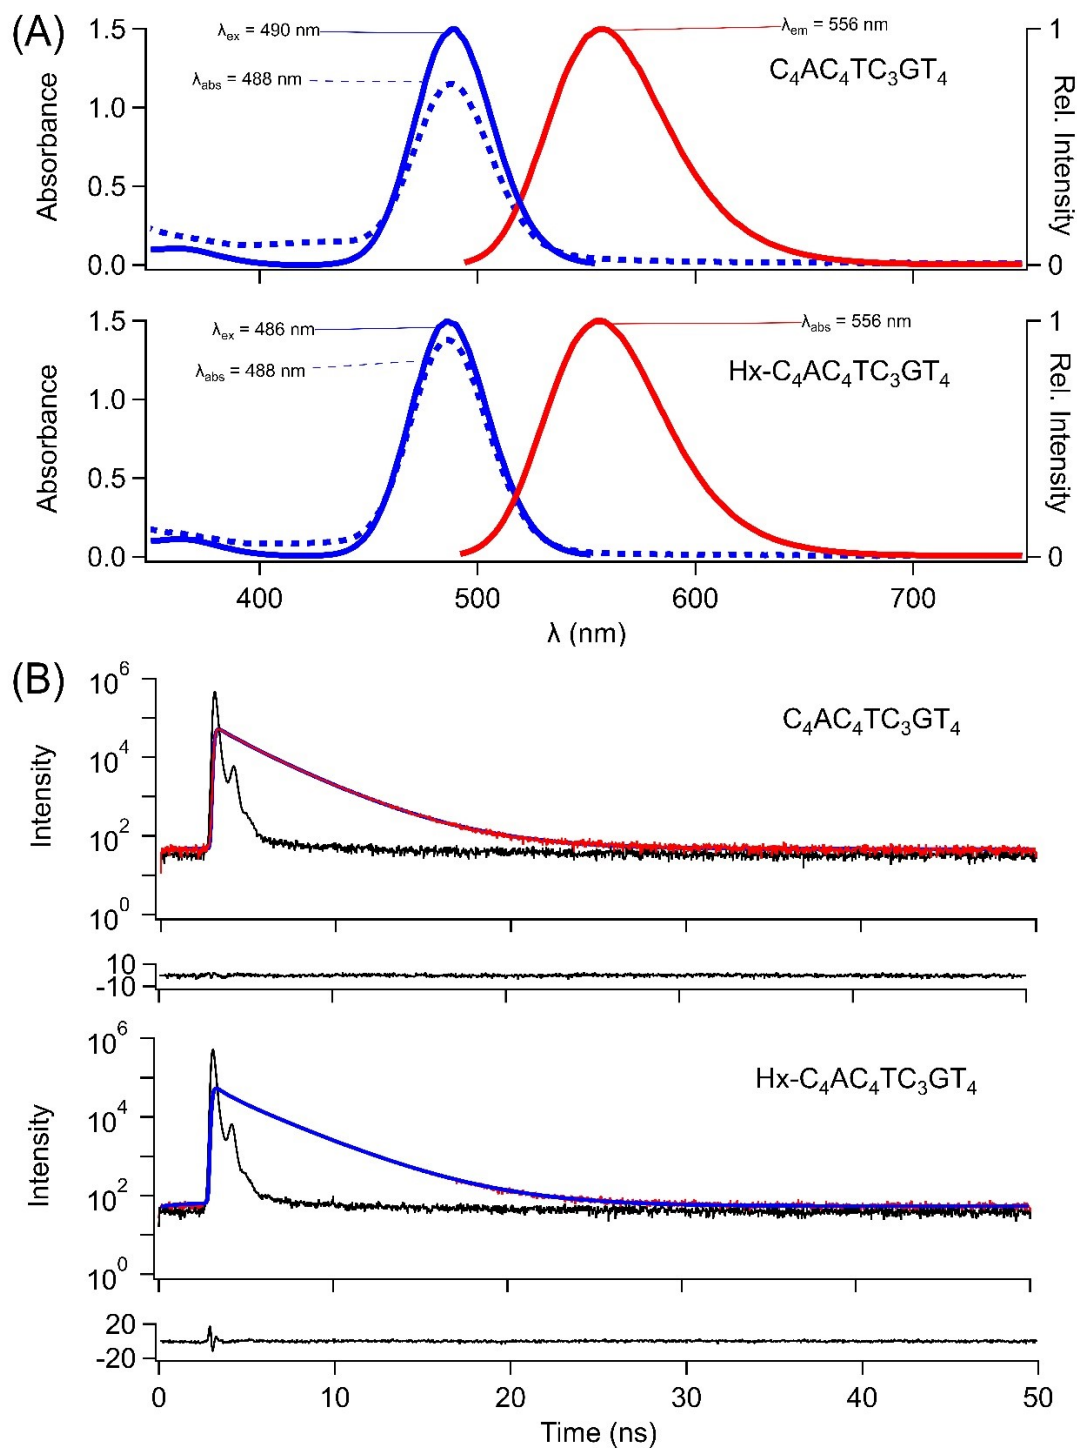

Figure S2: (A) Absorption (blue dotted), excitation (blue solid), and emission (red solid) spectra of  $C_4AC_4TC_3GT_4/Ag_{10}^{6+}$  (top) and  $Hx-C_4AC_4TC_3GT_4/Ag_{10}^{6+}$  (bottom) complexes. Similar  $\lambda_{max}$  values for absorption and fluorescence, overlapping absorption and excitation spectra, and comparable absorbances indicate similar binding sites for the  $Ag_{10}^{6+}$  adducts with both strands. (B) Fluorescence decays (red), IRF (black), and model results (blue) for  $C_4AC_4TC_3GT_4/Ag_{10}^{6+}$  (top) and  $Hx-C_4AC_4TC_3GT_4/Ag_{10}^{6+}$  (bottom) complexes. Residuals are provided below each decay. Similar lifetimes of 2.02 and 2.22 ns, respectively, also indicate similar binding sites for the  $Ag_{10}^{6+}$  adducts with both strands.

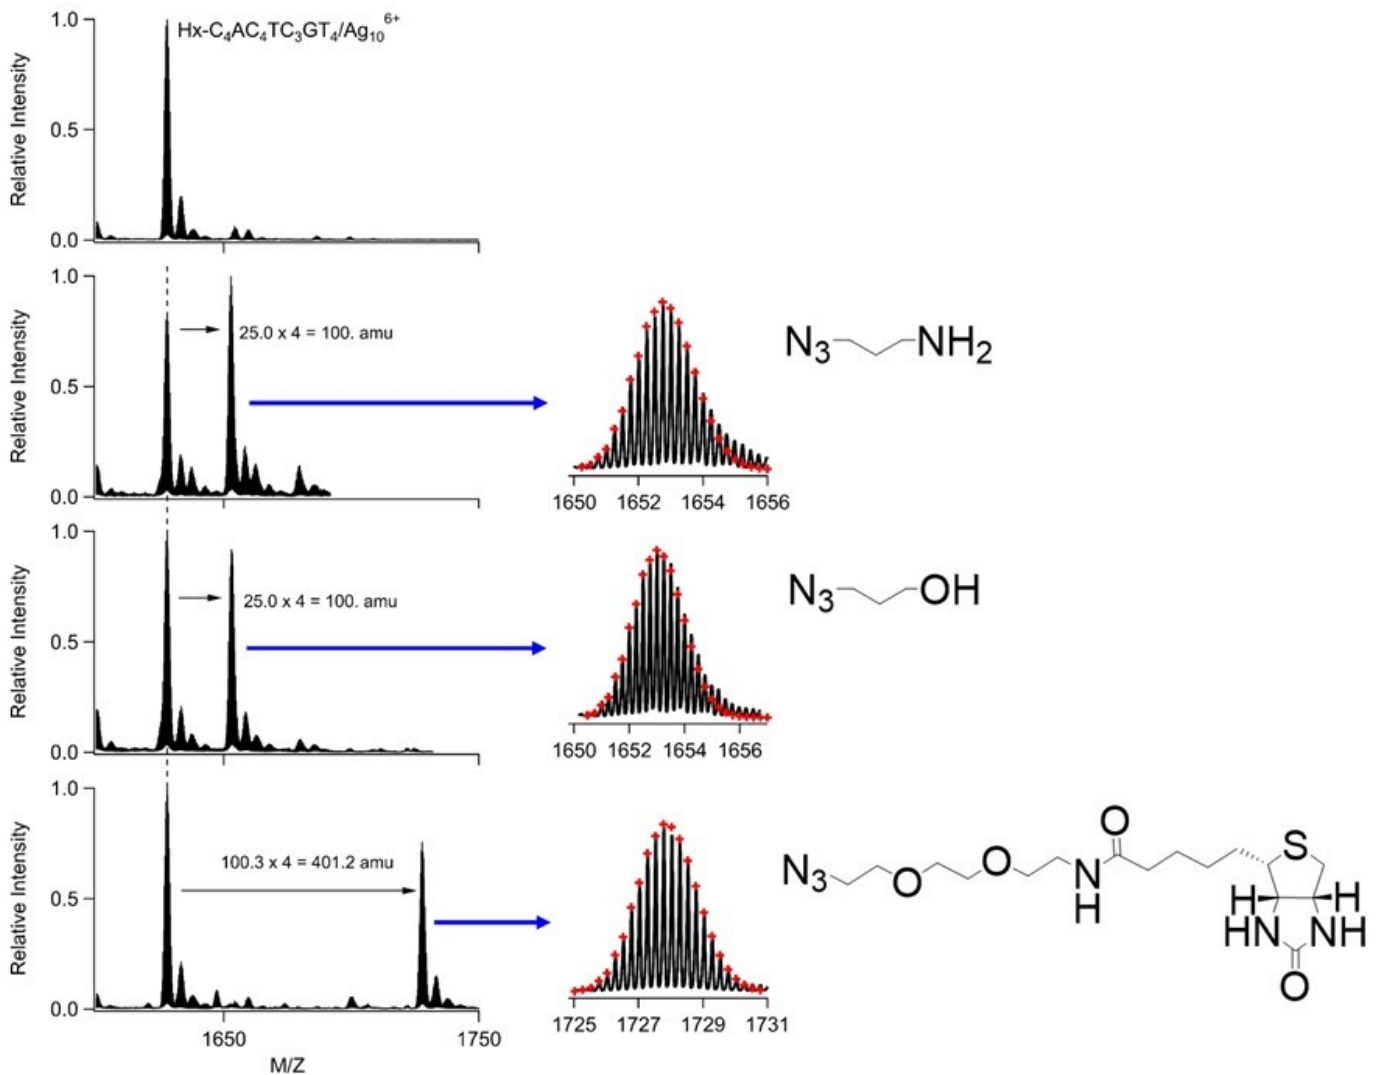

Figure 3S Mass spectra of the -4 charged Hx-C<sub>4</sub>AC<sub>4</sub>TC<sub>3</sub>GT<sub>4</sub> complexes with no azide, N<sub>3</sub>-C<sub>3</sub>H<sub>6</sub>-NH<sub>2</sub> (100.12 amu), N<sub>3</sub>-C<sub>3</sub>H<sub>6</sub>-OH (100.11 amu), and N<sub>3</sub>-C<sub>6</sub>H<sub>12</sub>O<sub>2</sub>-C<sub>10</sub>H<sub>16</sub>N<sub>3</sub>O<sub>2</sub>S (Biotin) (400.5 amu), respectively (top to bottom, respectively). The dashed line emphasizes the unreacted Hx-C<sub>4</sub>AC<sub>4</sub>TC<sub>3</sub>GT<sub>4</sub>/Ag<sub>10</sub><sup>6+</sup>. The M/Z shift due to the azides are emphasized by the black arrows. The panels to the right of each spectrum show the isotopic fine structure that determined the molecular formulas (see Tables 2S – 4S).

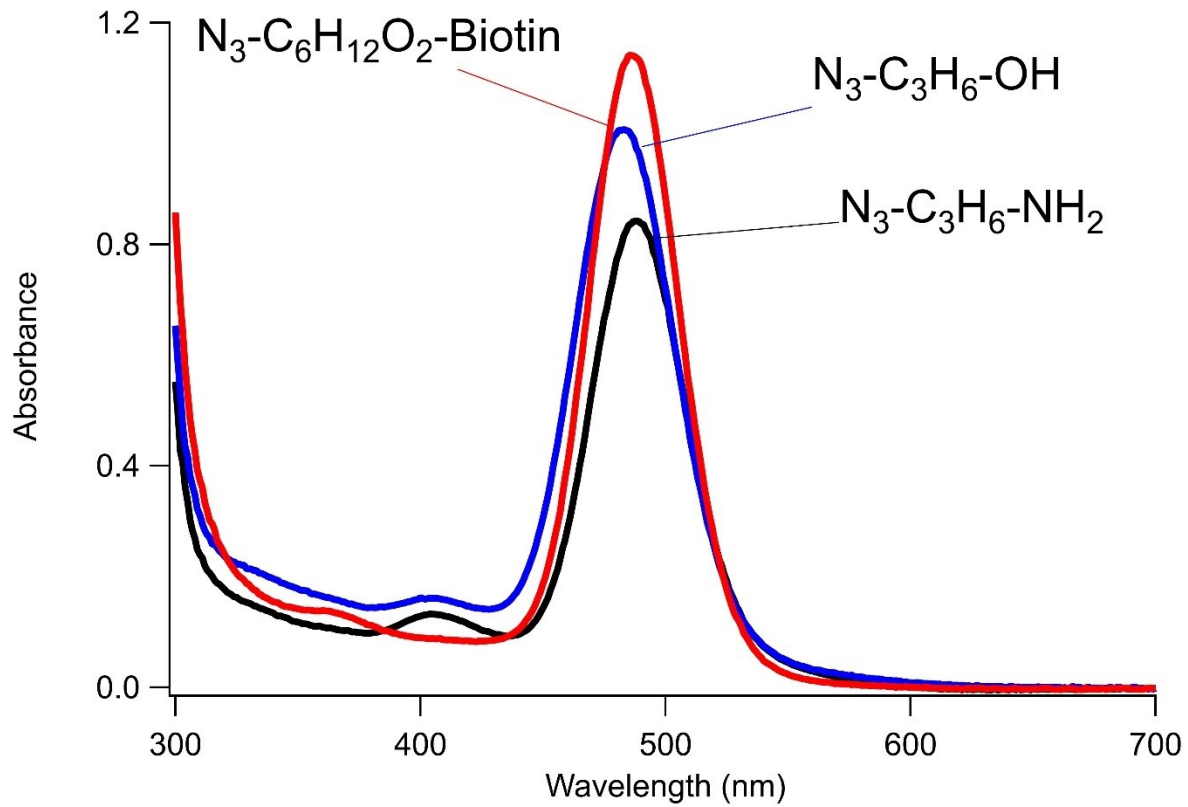

Figure 4S: Absorption spectra of  $Hx-C_4AC_4TC_3GT_4/Ag_{10}^{6+}$  with  $N_3-C_3H_6-NH_2$  (black) with  $\lambda_{max} = 488$  nm,  $N_3-C_3H_6-OH$  (blue) with  $\lambda_{max} = 484$  nm, and  $N_3-C_6H_{12}O_2-Biotin$  (red) with  $\lambda_{max} = 486$  nm. Similar  $\lambda_{max}$  values indicate that the clusters have similar binding sites.

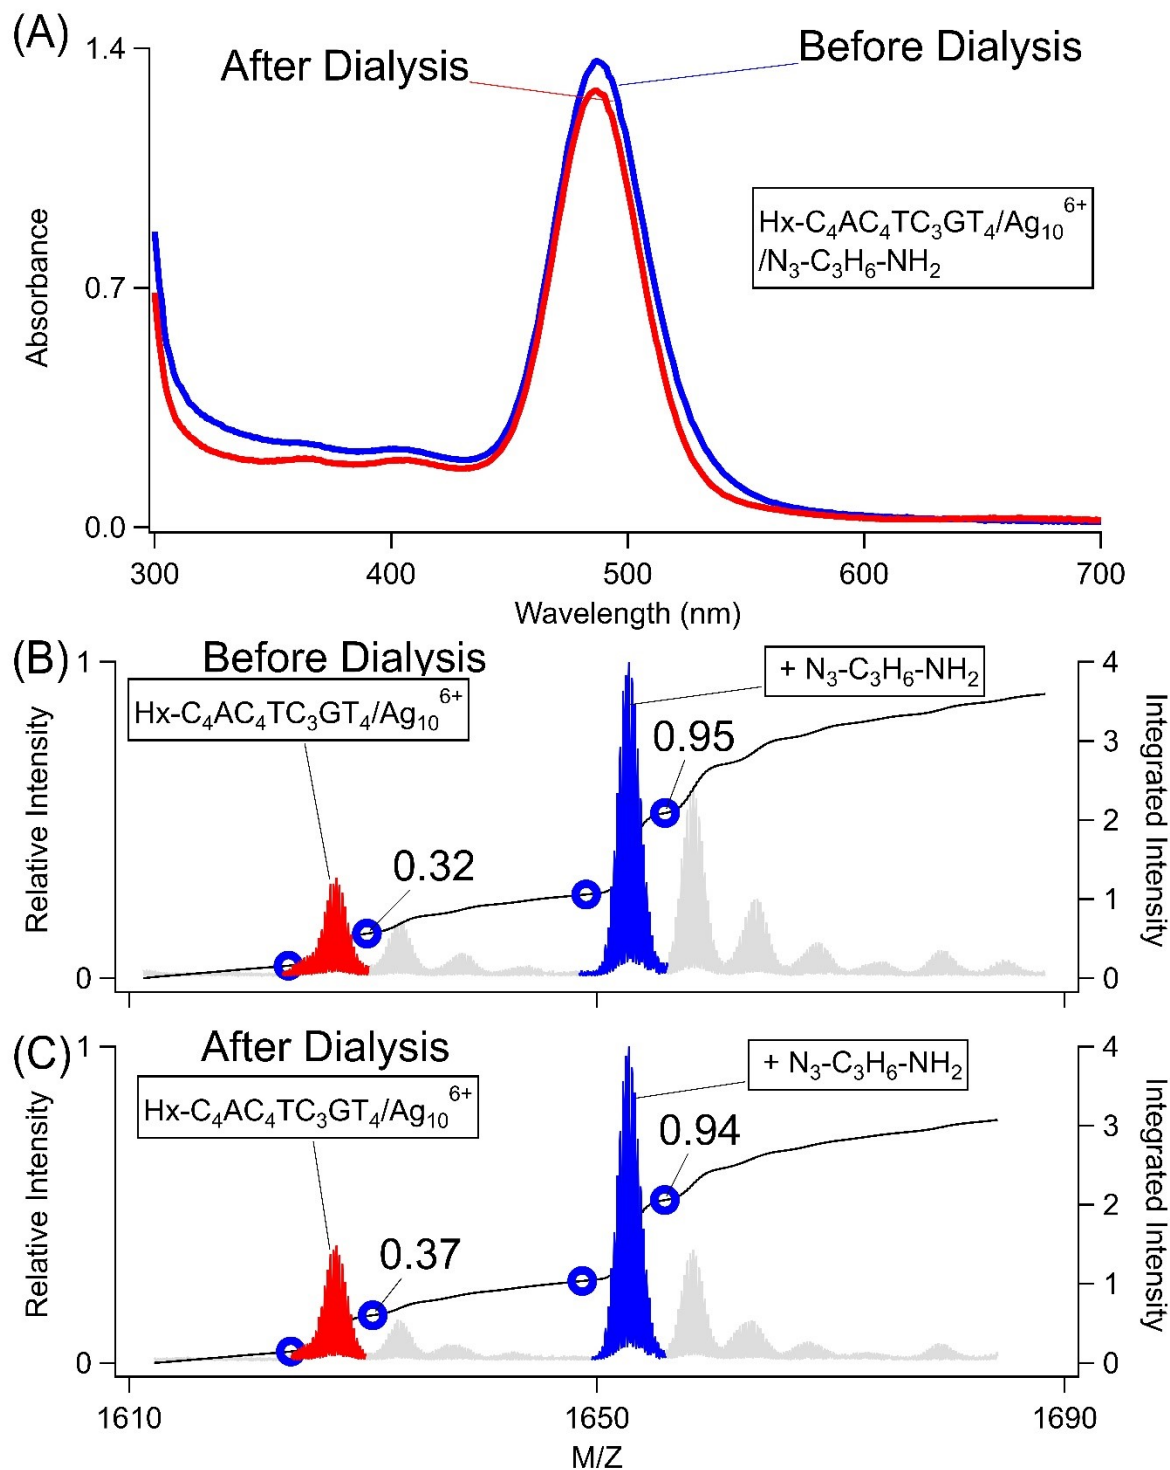

Figure 5S: (A) Absorption spectra before (blue) and after (red) dialysis against 100X volumes of solution. Similar spectra with comparable absorbances suggest that the silvers remain bound to  $\text{C}_4\text{AC}_4\text{TC}_3\text{GT}_4$  and does not dissociate into the bulk solution. (B) and (C) Mass spectra before (B) and after (C) dialysis against 100X volumes of solution. Similar conversion efficiencies suggest that DNA-bound  $\text{Ag}_{10}^{6+}$  and not leached silver is responsible for the click reaction.

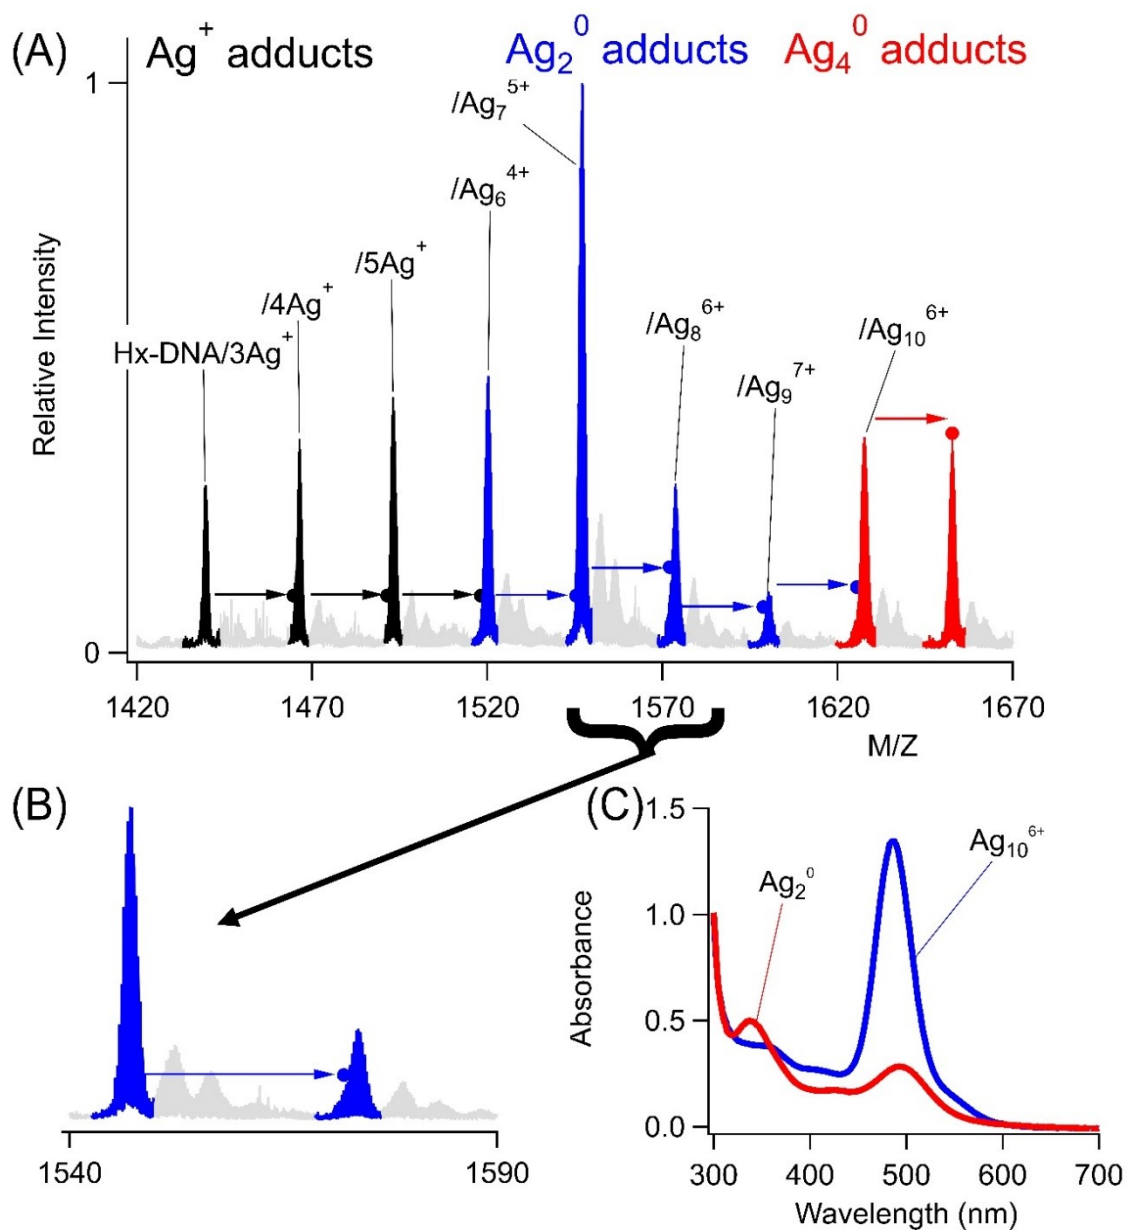

Figure 6S: Mass spectra of irradiated Hx-C<sub>4</sub>AC<sub>4</sub>TC<sub>3</sub>GT<sub>4</sub>. A series of mixed Ag<sup>+</sup>/Ag<sub>2</sub><sup>0</sup> (blue) and purely Ag<sup>+</sup> (black) complexes develop after irradiating Ag<sub>10</sub><sup>6+</sup> (red). After reaction with N<sub>3</sub>-C<sub>3</sub>H<sub>6</sub>-NH<sub>2</sub>, the Ag<sub>10</sub><sup>6+</sup> complex converts ~50%, whereas the other complexes show no appreciable conversion. The expected positions of the N<sub>3</sub>-C<sub>3</sub>H<sub>6</sub>-NH<sub>2</sub> products are indicated by arrows and dots. (B) An expanded view of the Ag<sub>7</sub><sup>5+</sup> complex shows a shoulder that indicates limited conversion that is much less than the Ag<sub>10</sub><sup>6+</sup> complex. (C) Absorption spectra of Hx-C<sub>4</sub>AC<sub>4</sub>TC<sub>3</sub>GT<sub>4</sub>/Ag<sub>10</sub><sup>6+</sup> before (blue) and after (red) irradiation using a 490 nm LED at 3 mW for 30 minutes. The 490 nm absorption due to the Ag<sub>4</sub><sup>0</sup> in Ag<sub>10</sub><sup>6+</sup> diminishes while the 335 nm band to a series of Ag<sub>2</sub><sup>0</sup> chromophores develops.

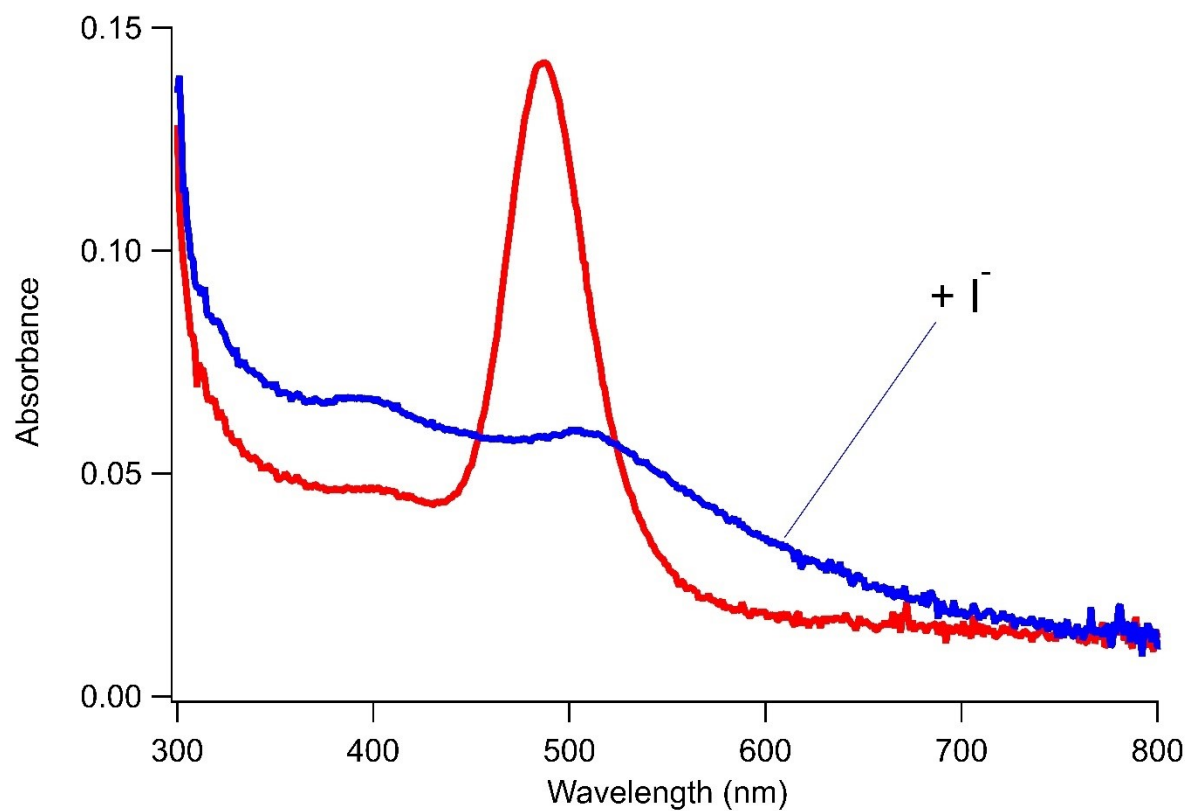

Figure 7S: Absorption spectra of Hx-C<sub>4</sub>AC<sub>4</sub>TC<sub>3</sub>GT<sub>4</sub>/Ag<sub>10</sub><sup>6+</sup> before (red) and after (blue) adding 1 equivalent NH<sub>4</sub>I:Ag. The loss of the absorption at  $\lambda_{\text{max}} = 490$  nm indicates that the cluster has degraded.

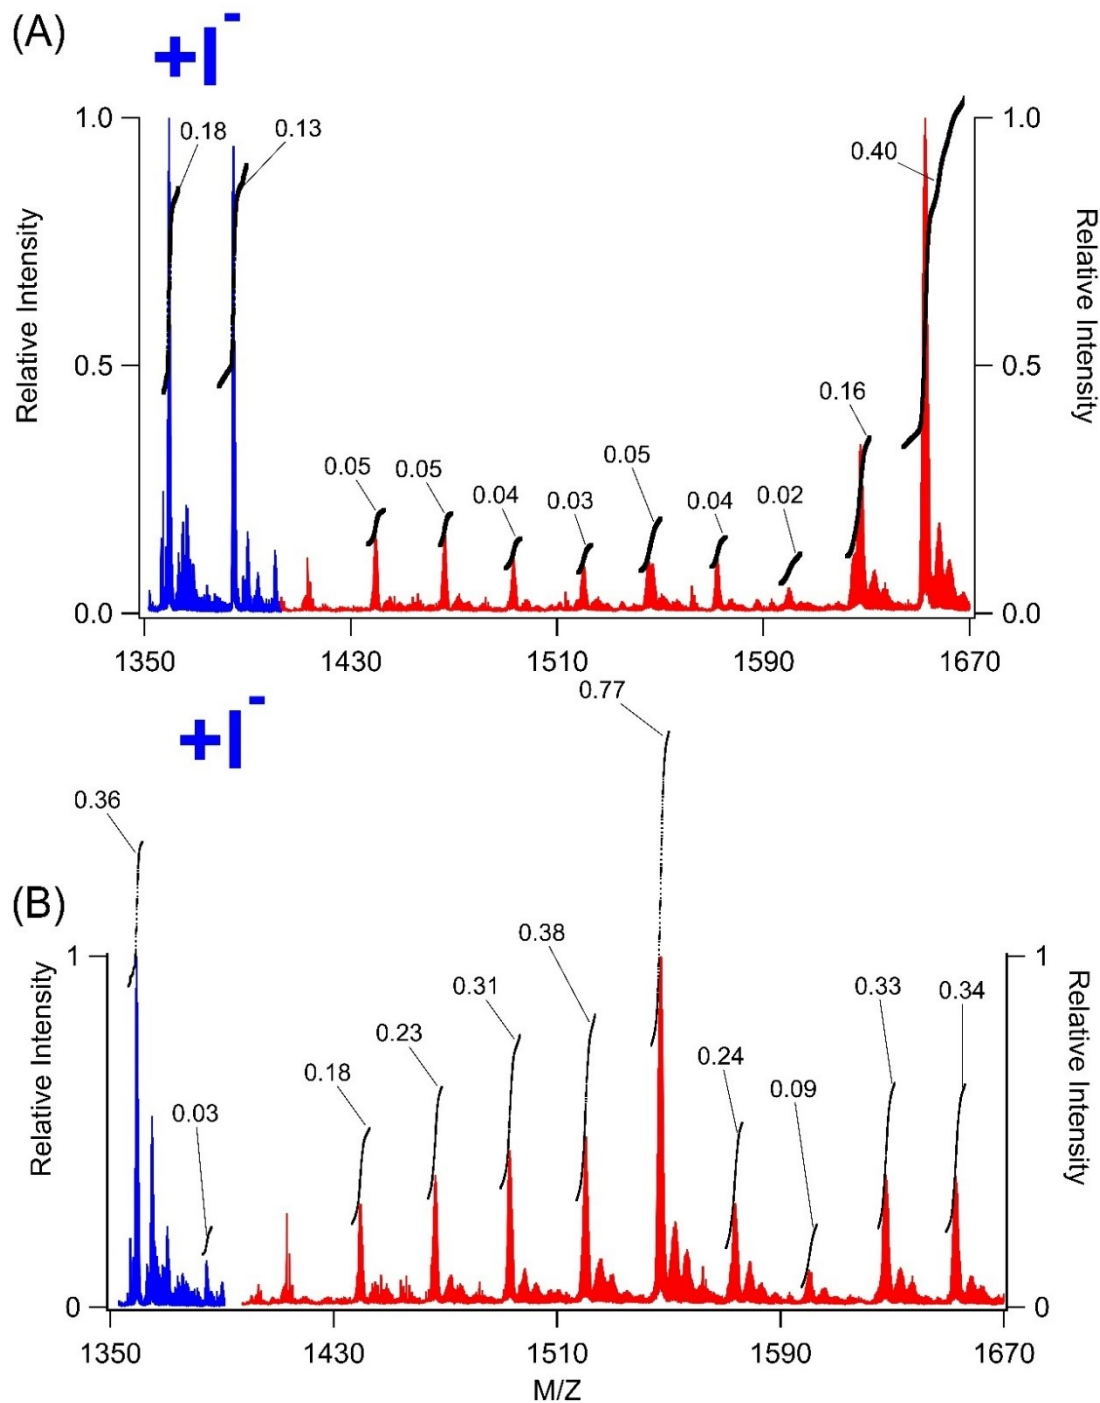

Figure 8S: Mass spectra before (red) and after (blue) etching with I<sup>-</sup>. (A) **No irradiation.** Red Peaks: The integrated areas of Hx-C<sub>4</sub>AC<sub>4</sub>TC<sub>3</sub>GT<sub>4</sub>/Ag<sub>10</sub><sup>6+</sup>/N<sub>3</sub>-C<sub>3</sub>H<sub>6</sub>-NH<sub>2</sub> vs all the other complexes is 48%. Blue Peaks: The integrated areas of Hx-C<sub>4</sub>AC<sub>4</sub>TC<sub>3</sub>GT<sub>4</sub>/N<sub>3</sub>-C<sub>3</sub>H<sub>6</sub>-NH<sub>2</sub> vs. both strands is 52%. (B) **With irradiation.** Red Peaks: The integrated areas of Hx-C<sub>4</sub>AC<sub>4</sub>TC<sub>3</sub>GT<sub>4</sub>/Ag<sub>10</sub><sup>6+</sup>/N<sub>3</sub>-C<sub>3</sub>H<sub>6</sub>-NH<sub>2</sub> vs all the other complexes is 12%. Blue Peaks: The integrated areas of Hx-C<sub>4</sub>AC<sub>4</sub>TC<sub>3</sub>GT<sub>4</sub>/N<sub>3</sub>-C<sub>3</sub>H<sub>6</sub>-NH<sub>2</sub> vs. both strands is 8%.

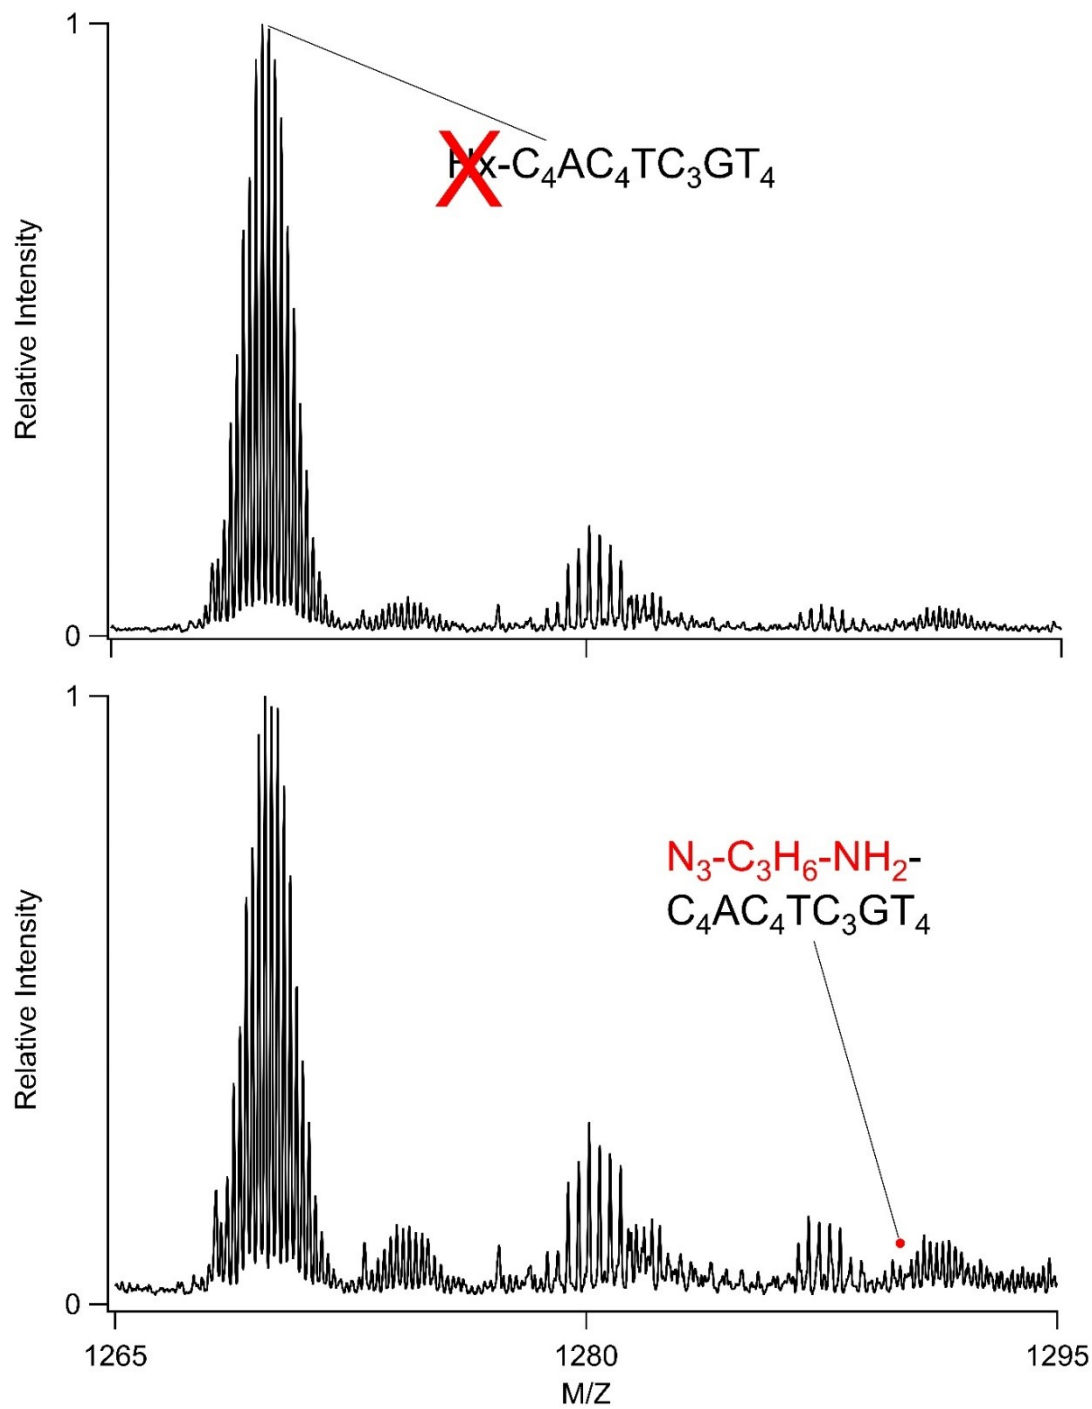

Figure 9S: Mass spectra of  $\text{C}_4\text{AC}_4\text{TC}_3\text{GT}_4/\text{Ag}_{10}^{6+}$  without (top) and with (bottom) 8 equivalents of  $\text{N}_3\text{-C}_3\text{H}_6\text{-NH}_2$ . The red dot in the bottom spectrum designates the expected M/Z of this adduct. Its absence indicates that the complex is not favored.



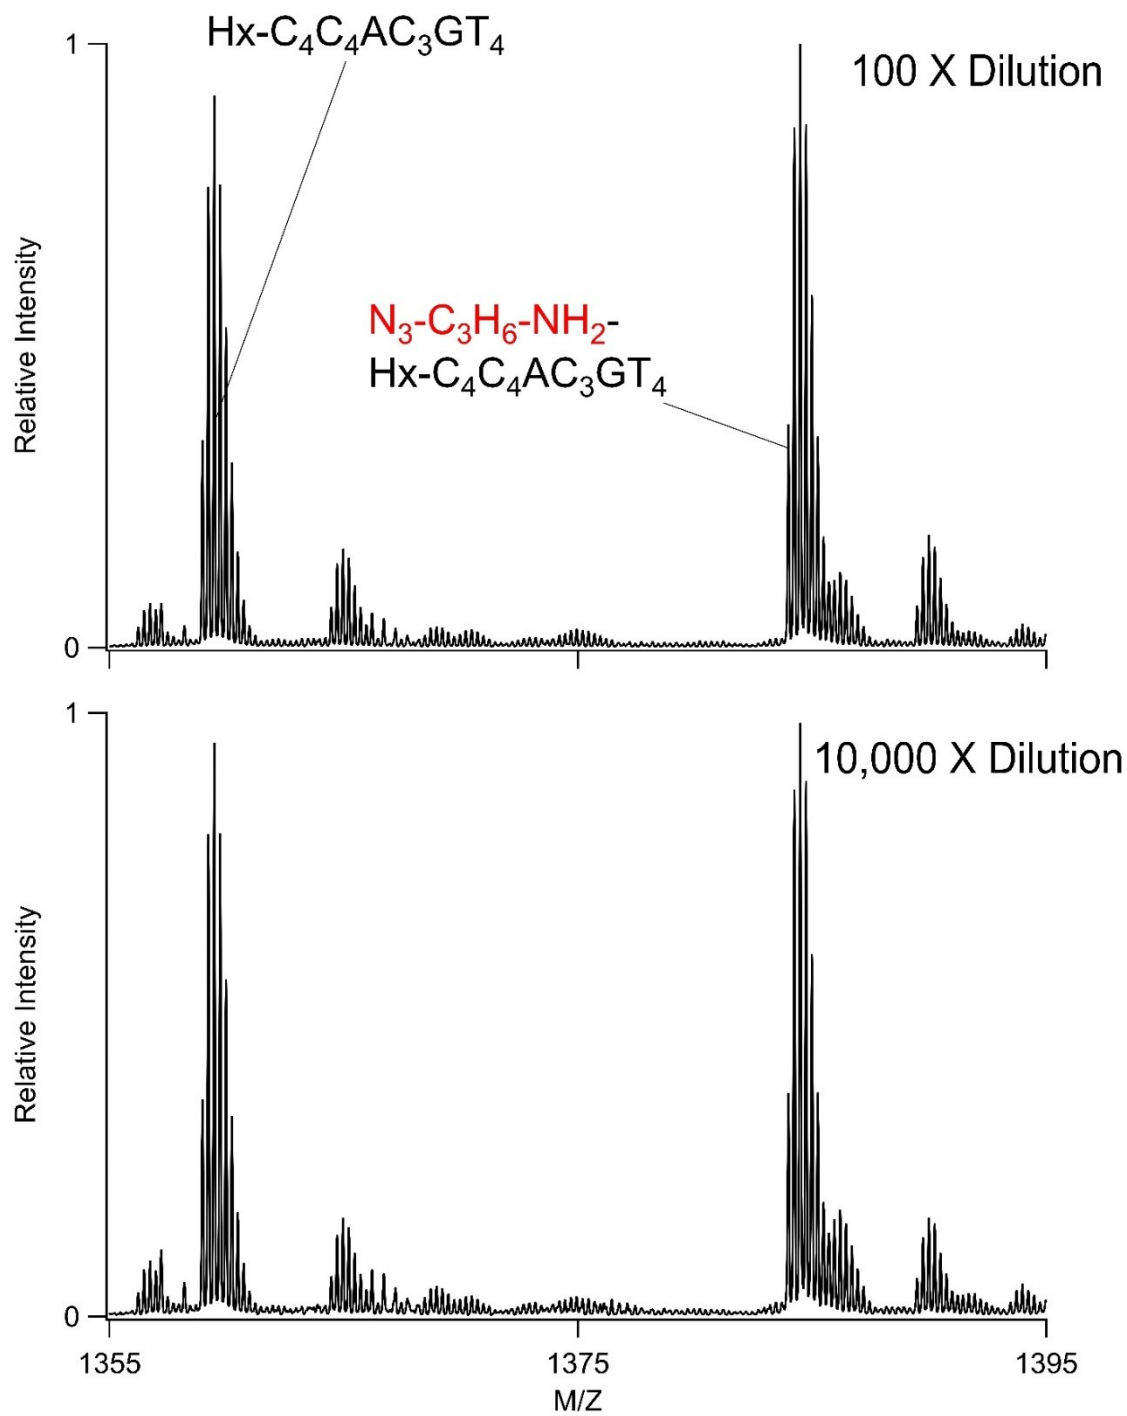

Figure 10S: Mass spectra of the -4 charged state of  $Hx-C_4AC_4TC_3GT_4$  without and with the azide  $N_3-C_3H_6-NH_2$  after diluting with 100X (top) followed by another 100X (bottom) volumes of solution. The similarity of the conversion efficiencies suggests that the azide is covalently joined as a triazole.

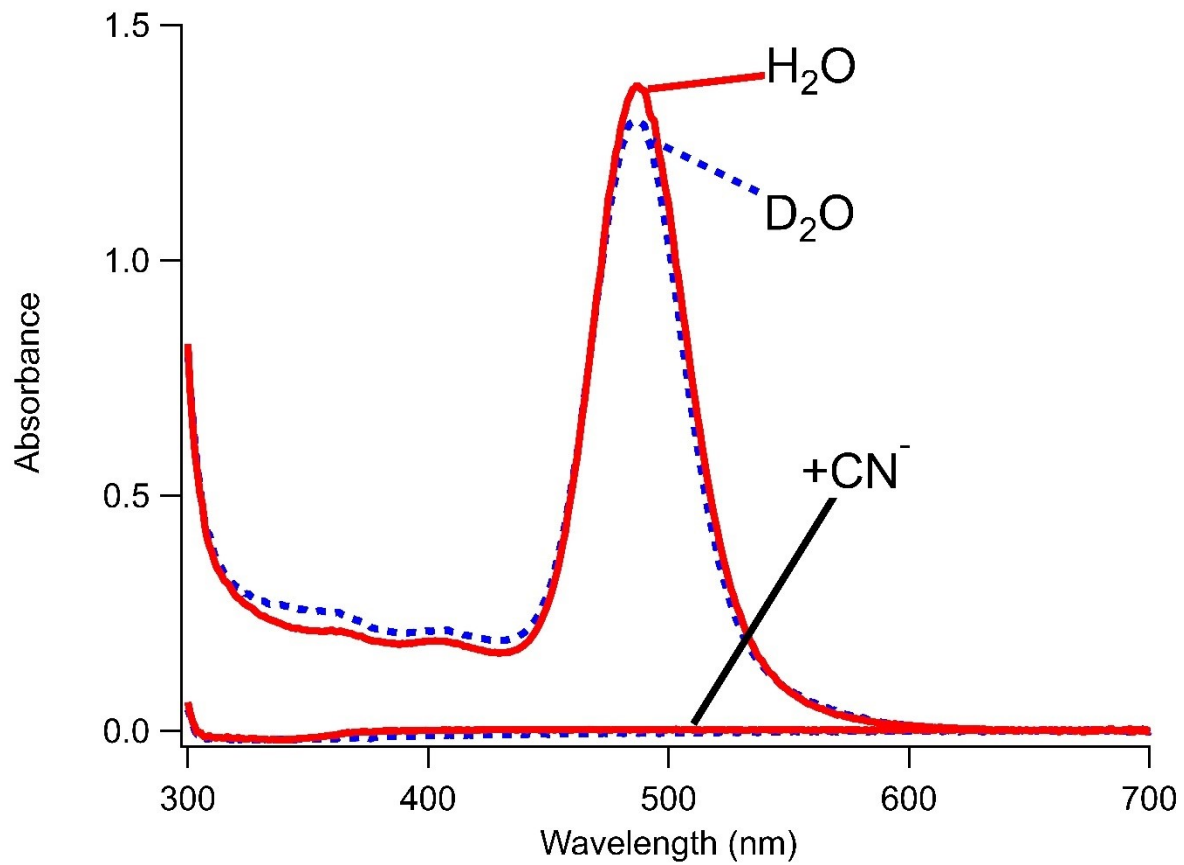

Figure 11S: Absorption spectra of Hx-C<sub>4</sub>AC<sub>4</sub>TC<sub>3</sub>GT<sub>4</sub>/Ag<sub>10</sub><sup>6+</sup> in H<sub>2</sub>O (solid red) and D<sub>2</sub>O (dotted blue) before and after adding 20 equivalents of CN<sup>-</sup>. The quenched absorption indicates that the cluster has been removed from the DNA.

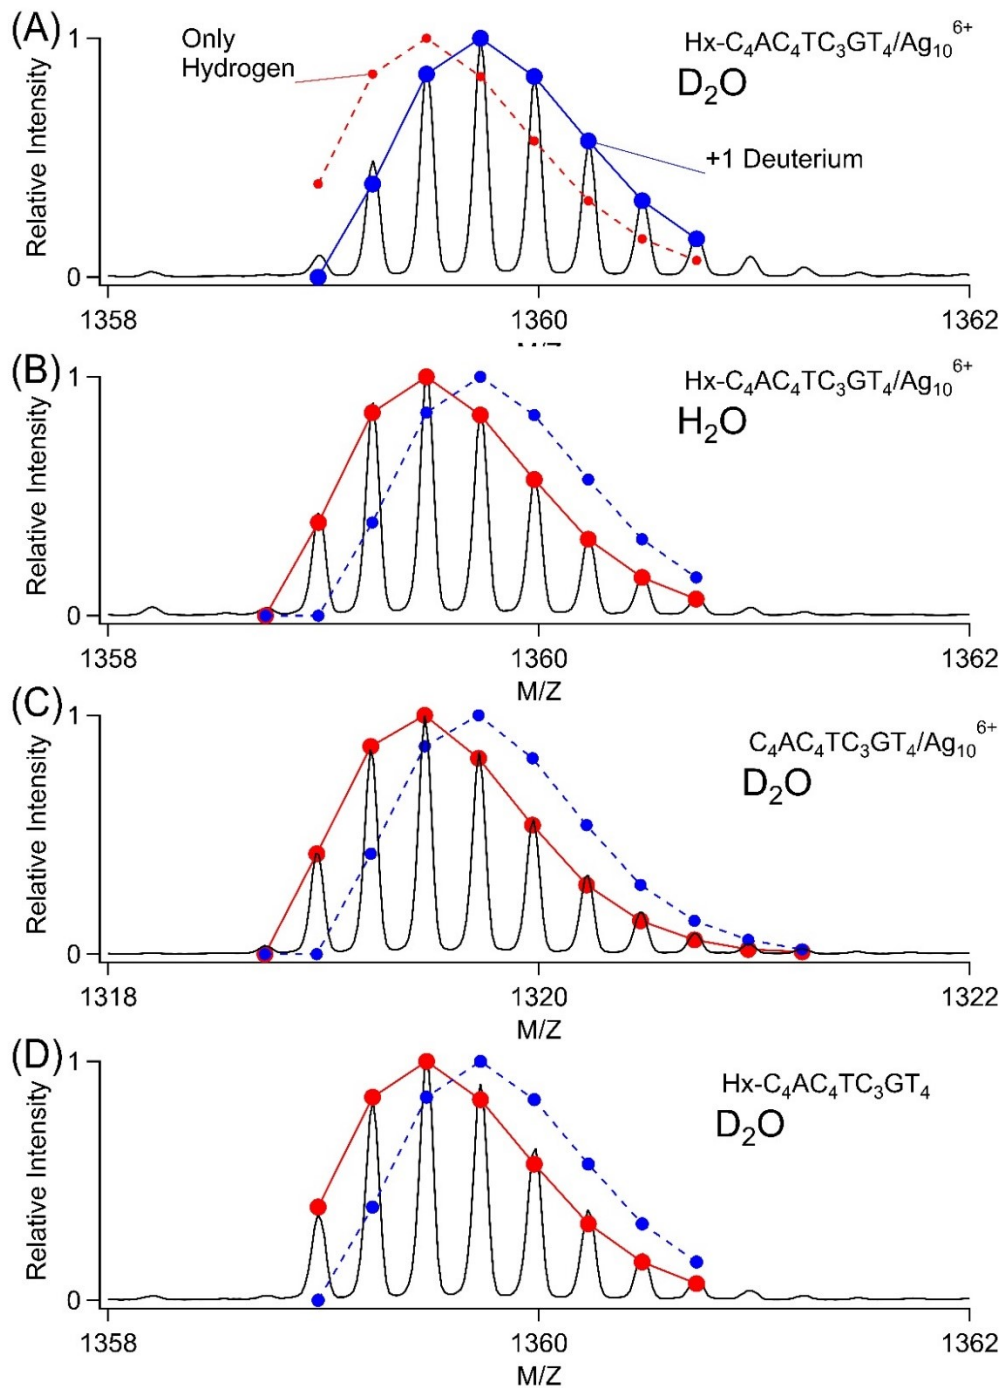

Figure 12S: Comparison of the isotope distributions of Hx-C<sub>4</sub>AC<sub>4</sub>TC<sub>3</sub>GT<sub>4</sub>/Ag<sub>10</sub><sup>6+</sup> after etching in D<sub>2</sub>O (A), Hx-C<sub>4</sub>AC<sub>4</sub>TC<sub>3</sub>GT<sub>4</sub>/Ag<sub>10</sub><sup>6+</sup> after etching in H<sub>2</sub>O (B), C<sub>4</sub>AC<sub>4</sub>TC<sub>3</sub>GT<sub>4</sub>/Ag<sub>10</sub><sup>6+</sup> after etching in D<sub>2</sub>O (C), and Hx-C<sub>8</sub>C<sub>4</sub>TC<sub>3</sub>GT<sub>4</sub> in D<sub>2</sub>O (D). Models are based exclusively on hydrogen (red) and hydrogen with 1 deuterium (blue). The model that best describes the data is indicated by a solid line. Only the Hx-C<sub>4</sub>AC<sub>4</sub>TC<sub>3</sub>GT<sub>4</sub>/Ag<sub>10</sub><sup>6+</sup> after etching in D<sub>2</sub>O is best described by a model with 1 deuterium.

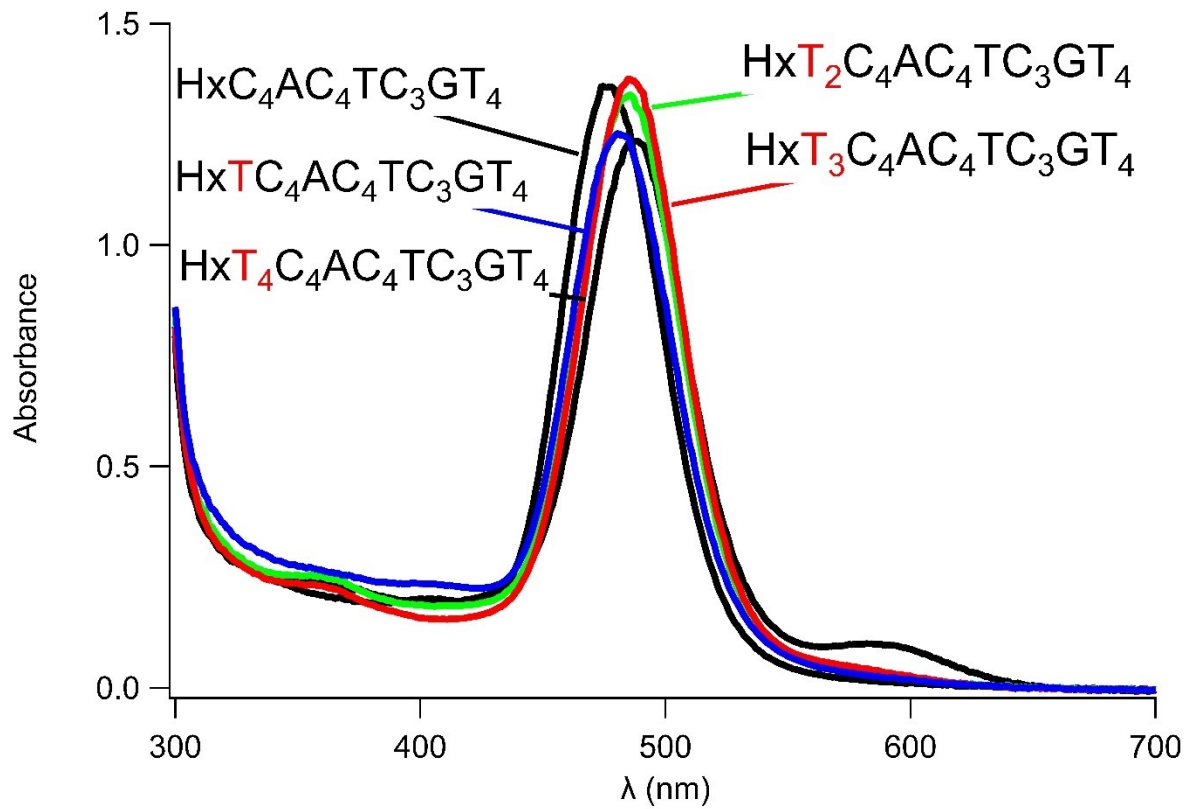

Figure 13S: Absorption spectra of  $Hx-T_x-C_4AC_4TC_3GT_4$  strands with  $x = 0, 1, 2, 3,$  and  $4$ . Similar  $\lambda_{max}$  and absorbances indicate that the clusters form in similar binding sites.

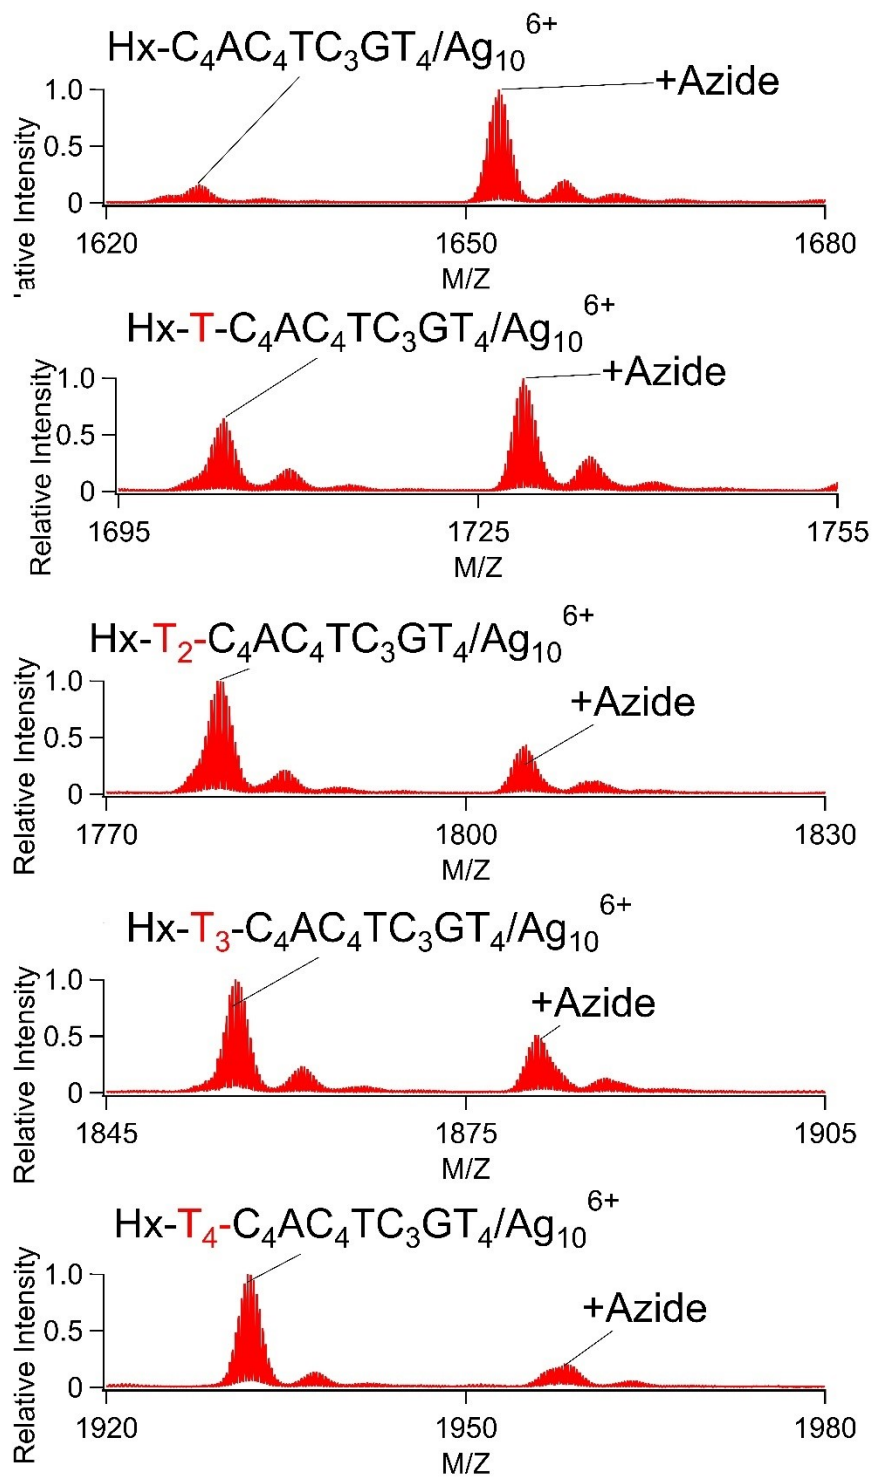

Figure 14S: Mass spectra of Hx-T<sub>x</sub>-C<sub>4</sub>AC<sub>4</sub>TC<sub>3</sub>GT<sub>4</sub> complexes with x = 0, 1, 2, 3, and 4 respectively. The conversion efficiency decreases as the number of thymines increases.

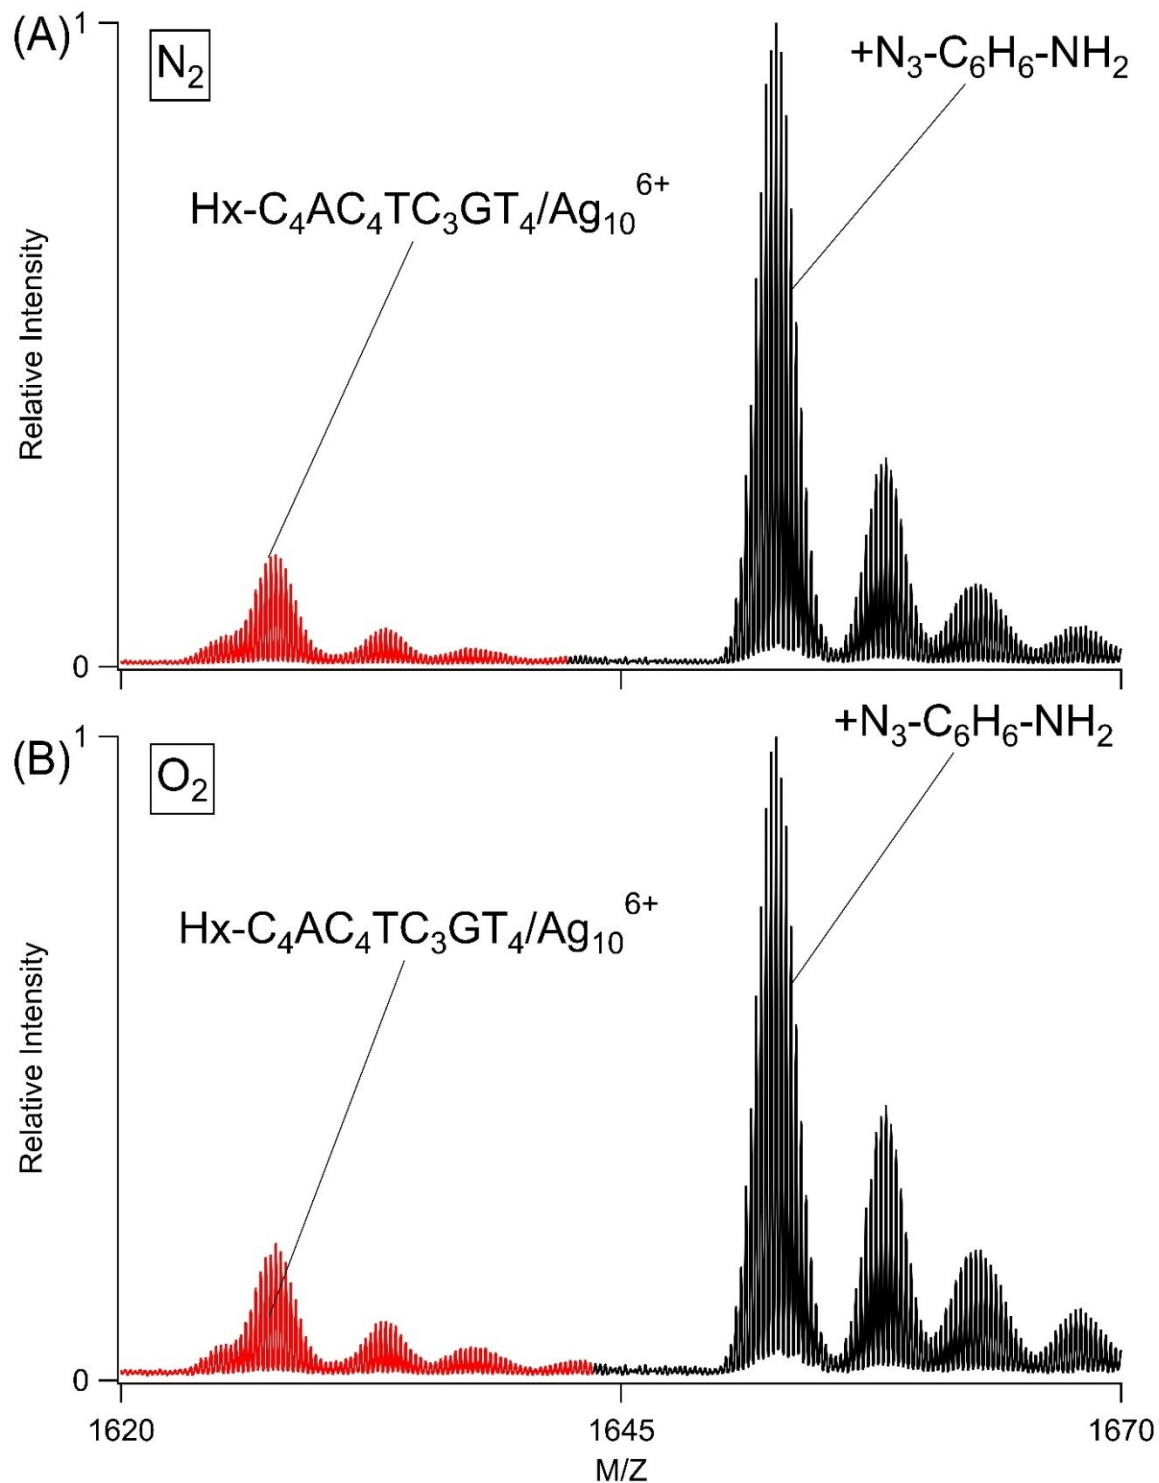

Figure 15S: Mass spectra of the -4 charged ion of  $\text{Hx-C}_4\text{AC}_4\text{TC}_3\text{GT}_4/\text{Ag}_{10}^{6+}$  reacted with  $\text{N}_3\text{-C}_3\text{H}_6\text{-NH}_2$  using solutions saturated with  $\text{N}_2$  (top) and  $\text{O}_2$  (bottom). The similar conversion efficiencies suggest that  $\text{O}_2$  does not alter the  $\text{Ag}_{10}^{6+}$ .

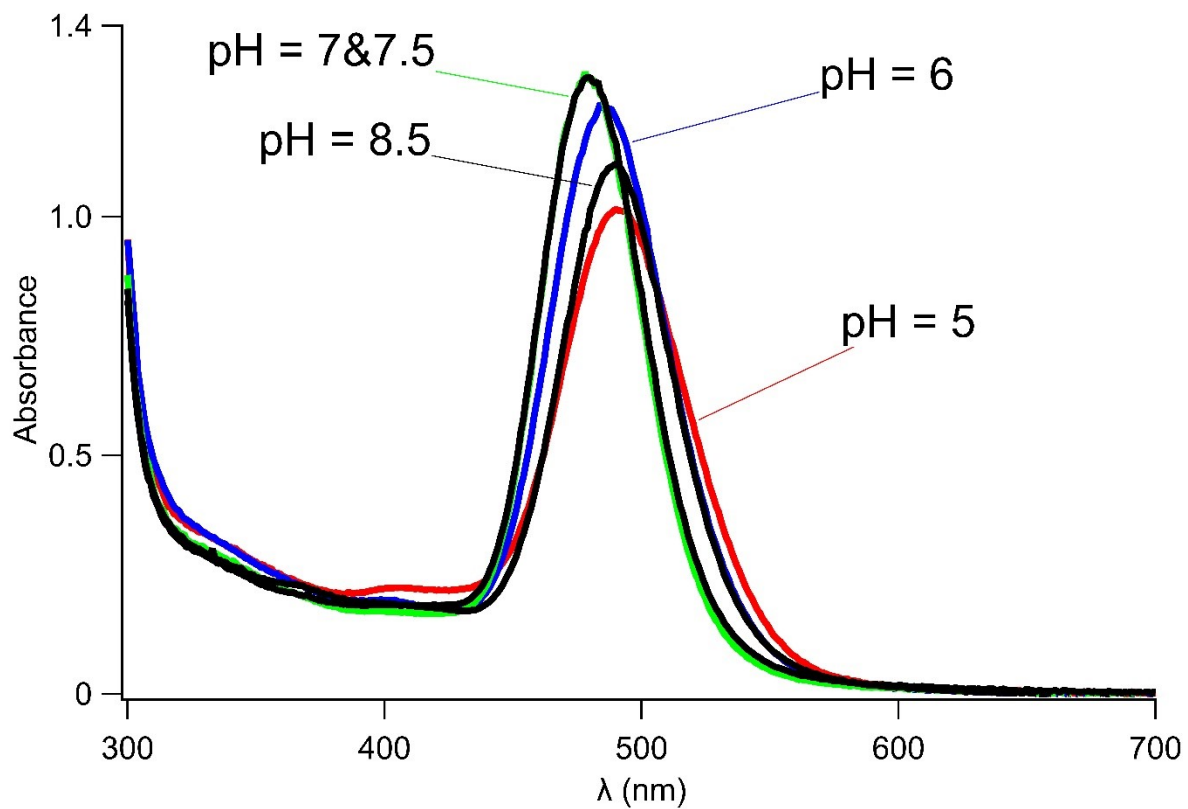

Figure 16S: Absorption spectra of Hx-C<sub>4</sub>AC<sub>4</sub>TC<sub>3</sub>GT<sub>4</sub>/Ag<sub>10</sub><sup>6+</sup> in buffers with different pH values. Similar absorbances and spectra indicate similar coordination environments under these conditions.

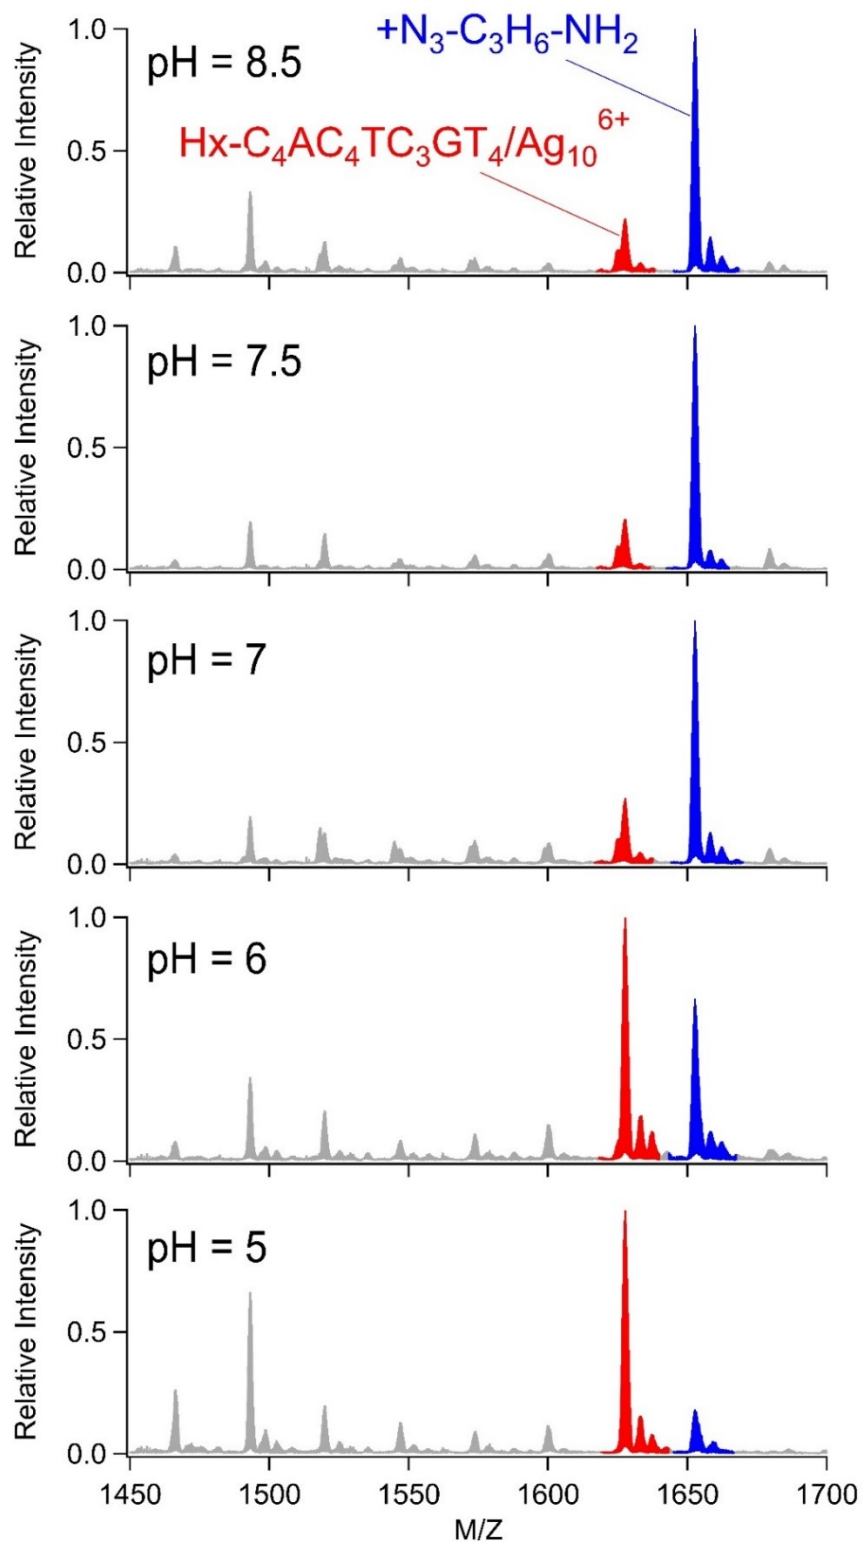

Figure 17S: Mass spectra showing the enhanced conversion efficiency between pH = 6 – 7. The red peaks correspond to Hx-C<sub>4</sub>AC<sub>4</sub>TC<sub>3</sub>GT<sub>4</sub>/Ag<sub>10</sub><sup>6+</sup>, and the blue peaks correspond to Hx-C<sub>4</sub>AC<sub>4</sub>TC<sub>3</sub>GT<sub>4</sub>/Ag<sub>10</sub><sup>6+</sup>/N<sub>3</sub>-C<sub>3</sub>H<sub>6</sub>-NH<sub>2</sub>. The conversion efficiencies were 0.18 at pH = 5 and 4.5 at pH = 8.5, thus giving a relative ratio ~25 over this pH range.
